# Supplementary material for: Health Literacy in Africa – A Scoping Review
Source: Preprints.org preprint supplement (doi:10.20944/preprints202409.0887.v1), 2024-09-12
Supplement: Supplementary file 1 [file supplementary]

## Appendix C: Health Literacy in Africa: a Systematic Review of Trends

| Country                                             | Number studies(1) | Year | Health literacy focus                                                                                                                                                                                                         |
|-----------------------------------------------------|-------------------|------|-------------------------------------------------------------------------------------------------------------------------------------------------------------------------------------------------------------------------------|
| African but not individual country specific records |                   |      |                                                                                                                                                                                                                               |
| Africa                                              | 14                | 2014 | HL, CD (Covid-19), NCD (cancer), oral health, maternal health, reproductive health, patient & palliative care                                                                                                                 |
| Sub-Saharan Africa                                  | 12                | 2015 | Mental health, CD (HIV/Aids), NCD (stroke, cancer), HL, mental HL, maternal health, disease literacy                                                                                                                          |
| <b>Northern Africa</b>                              |                   |      |                                                                                                                                                                                                                               |
| Algeria                                             | 0/1               | 2019 | Acceptance of app (diabetes)                                                                                                                                                                                                  |
| Egypt                                               | 7/2               | 2015 | Health literacy, NCD (cancer), antibiotic resistance                                                                                                                                                                          |
| Libya                                               | 0/0               | n.d. | n.d.                                                                                                                                                                                                                          |
| Morocco                                             | 2/0               | 2018 | CD (tuberculosis), asthma medication adherence                                                                                                                                                                                |
| Sudan                                               | 0/1               | 2021 | CD (Covid-19)                                                                                                                                                                                                                 |
| Tunisia                                             | 0/0               | n.d. | n.d.                                                                                                                                                                                                                          |
| <b>Eastern Africa</b>                               |                   |      |                                                                                                                                                                                                                               |
| Burundi                                             | 0/1               | 2022 | mental health                                                                                                                                                                                                                 |
| Comoros                                             | 0/0               | n.d. | n.d.                                                                                                                                                                                                                          |
| Djibouti                                            | 0/0               | n.d. | n.d.                                                                                                                                                                                                                          |
| Eritrea                                             | 0/0               | n.d. | n.d.                                                                                                                                                                                                                          |
| Ethiopia                                            | 25/2              | 2012 | CD (Covid-19, Podoconiosis, tuberculosis), NCD (diabetes, cancer), maternal health, child health, mental health, ehealth, health literacy (including functional HL, communicative HL) health service provision, medication HL |
| Kenya                                               | 12/3              | 2010 | NCD (cancer), mental health, maternal and child health, sexual and reproductive health, environmental HL, HL                                                                                                                  |
| Madagascar                                          | 2/0               | 2015 | Nutrition, maternal HL                                                                                                                                                                                                        |
| Malawi                                              | 11/4              | 2015 | CD (Covid-19, HIV), NCD (diabetes, cancer), maternal health, child health, Mental health, /mental health                                                                                                                      |
| Mauritius                                           | 0/0               | n.d. | n.d.                                                                                                                                                                                                                          |
| Mozambique                                          | 3/0               | 2014 | HIV, nutrition                                                                                                                                                                                                                |
| Réunion                                             | 0/0               | n.d. | n.d.                                                                                                                                                                                                                          |
| Rwanda                                              | 6/1               | 2016 | CD (Malaria), NCD (diabetes), HL, diseases literacy, mental health, patient-provider communication/HL                                                                                                                         |
| Seychelles                                          | 0/0               | n.d. | n.d.                                                                                                                                                                                                                          |
| Somalia                                             | 1/0               | 2021 | Language in health care                                                                                                                                                                                                       |
| South Sudan                                         | 0/0               | n.d. | n.d.                                                                                                                                                                                                                          |

| Country                          | Number studies(1) | Year | Health literacy focus                                                                                                                                                                                                                            |
|----------------------------------|-------------------|------|--------------------------------------------------------------------------------------------------------------------------------------------------------------------------------------------------------------------------------------------------|
| Uganda                           | 23/4              | 2007 | CD (tuberculosis), NCD (heart disease, cancer, gastrointestinal, hypertension,) health care utilization, HL, medication, maternal health, mental health, sexual HL, infant oral mutilation                                                       |
| Tanzania                         | 11/3              | 2009 | HL, mental health, NDC (cardiovascular disease) empowerment, Mental health/antenatal HL                                                                                                                                                          |
| Zambia                           | 6/5               | 2007 | HL, mental health, prison committee/HL, antenatal HL                                                                                                                                                                                             |
| Zimbabwe                         | 2/2               | 2005 | Disability, HL/HIV                                                                                                                                                                                                                               |
| <b>Central Africa</b>            |                   |      |                                                                                                                                                                                                                                                  |
| Angola                           | 1/0               | 2022 | HL questionnaire                                                                                                                                                                                                                                 |
| Cameroon                         | 1/2               | 2021 | NCD (cancer)                                                                                                                                                                                                                                     |
| Central African Republic         | 0/0               | n.d. | n.d.                                                                                                                                                                                                                                             |
| Chad                             | 0/0               | n.d. | n.d.                                                                                                                                                                                                                                             |
| Congo                            | 0/0               | n.d. | n.d.                                                                                                                                                                                                                                             |
| Democratic Republic of the Congo | 1/1               | 2018 | Heart failure, health literacy                                                                                                                                                                                                                   |
| Equatorial Guinea                | 0/0               | n.d. | n.d.                                                                                                                                                                                                                                             |
| Gabon                            | 0/0               | n.d. | n.d.                                                                                                                                                                                                                                             |
| Sao Tome and Principe            | 0/0               | n.d. | n.d.                                                                                                                                                                                                                                             |
| <b>Southern Africa</b>           |                   |      |                                                                                                                                                                                                                                                  |
| Botswana                         | 1/2               | 2016 | HIV, life-style (alcohol)                                                                                                                                                                                                                        |
| Eswatini                         | 1/0               | 2022 | Mental health                                                                                                                                                                                                                                    |
| Lesotho                          | 2/1               | 2016 | Hypertension, HL/HL                                                                                                                                                                                                                              |
| Namibia                          | 1/3               | 2020 | Health literacy/HL                                                                                                                                                                                                                               |
| South Africa                     | 79/               | 1991 | CD (HIV, Covid-19, tuberculosis, schistosomiasis); NCD (cancer, stroke, diabetes, heart disease, chronic), HL, mental health, nutrition, occupational H, oral H, organ donation, reproductive health, social media, drug prevention, health care |
| <b>Western Africa</b>            |                   |      |                                                                                                                                                                                                                                                  |
| Benin                            | 1/1               | 2015 | Oral / health care service                                                                                                                                                                                                                       |
| Burkina Faso                     | 3/1               | 2013 | Covid-19, reproductive health, oral health, Covid-19                                                                                                                                                                                             |
| Cabo Verde                       | 2/1               | 2015 | Sexual and reproductive health, cardiovascular diseases / Covid-19                                                                                                                                                                               |
| Côte d'Ivoire                    | 1/1               | 2020 | HIV&Aids / HL                                                                                                                                                                                                                                    |
| The Gambia                       | 2/0               | 2019 | Malaria                                                                                                                                                                                                                                          |
| Ghana                            | 27/1              | 2014 | Mental health, maternal/antenatal health, CD (malaria, cholera, HIV), NDC (breast cancer, foodborne disease, HL, oral health, sexual and reproductive health, social participation/HL                                                            |

| Country       | Number studies(1) | Year | Health literacy focus                                                                                                                                                                                                                   |
|---------------|-------------------|------|-----------------------------------------------------------------------------------------------------------------------------------------------------------------------------------------------------------------------------------------|
| Guinea        | 1/1               | 2006 | Reproductive health/health literacy                                                                                                                                                                                                     |
| Guinea-Bissau | 1/1               | 2016 | HIV / Covid-19                                                                                                                                                                                                                          |
| Liberia       | 1/1               | 2021 | Mental health                                                                                                                                                                                                                           |
| Mali          | 0/0               | n.d. | n.d.                                                                                                                                                                                                                                    |
| Mauritania    | 0/0               | n.d. | n.d.                                                                                                                                                                                                                                    |
| Niger         | 1/0               | 2016 | CD (malaria)                                                                                                                                                                                                                            |
| Nigeria       | 48/0              | 2010 | HL, maternal and child health, mental health, CD (tuberculosis, vaccine, Covid-19) NCD (cancer, diabetes, stroke), sexual and reproductive health), occupational HL, oral health, genomic literacy, eye care, environmental HL, ehealth |
| Saint Helena  | 0/0               | n.d. | n.d.                                                                                                                                                                                                                                    |
| Senegal       | 3/                | 2016 | Oral health, health information, family planning                                                                                                                                                                                        |
| Sierra Leone  | 1/1               | 2022 | Treatment adherence/HL                                                                                                                                                                                                                  |
| Togo          | 0/1               | 2020 | n.d./HL                                                                                                                                                                                                                                 |

Note: Classification based on the UN-Classification URL: <https://unstats.un.org/unsd/methodology/m49/>

- (1) First number indicates records that include only that specific country, second number indicates whether country is included in a multi-country study
