# Supplementary material for: Health Literacy in Africa – A Scoping Review
Source: Preprints.org preprint supplement (doi:10.20944/preprints202409.0887.v1), 2024-09-12
Supplement: Supplementary file 1 [file supplementary]

**Appendix B: HL in Africa – overview of included articles**

| **Author** | **Country** | **Year of Pub.** | **Title** | **Study aim** |
| --- | --- | --- | --- | --- |
| Azmat et al. | Africa and Latin America, not country specific | 2021 | Scoping Review on the Impact of Outbreaks on Sexual and Reproductive Health Services: Proposed Frameworks for Pre-, Intra-, and Postoutbreak Situations. | Yet, to date, there is no review studying the possible impact of outbreaks on sexual and reproductive health |
| Ganasen et al. | Africa multiple countries not specific | 2008 | Mental health literacy: focus on developing countries. | This is a non-systematic review of published articles on mental health literacy in the general population and among primary healthcare workers, in particular, in developing countries |
| Gresh et al. | Africa not country specific | 2021 | Postpartum care content and delivery throughout the African continent: An integrative review. | The objective of this review was to describe and evaluate the content of postpartum care and models of delivery throughout the African continent. |
| Ogunbodede et al. | Africa, no country specific | 2015 | Oral Health Inequalities between Rural and Urban Populations of the African and Middle East Region. | The purpose of this review is to highlight some of the conceptual issues relating to urban-rural inequalities in oral health, especially in the African and Middle East Region (AMER) of the International Association for Dental Research as defined in 2003 |
| Park | Africa, no country specified | 2021 | The effect of advances in transportation on the spread of the coronavirus disease: The last is Africa and endemic. | The objective of this review was to evaluate the historical events related to advances in transportation and the spread of infectious diseases to help address these questions, and to rationally assess and present the progress on COVID-19, transportation, and population movement to date. |
| Afolabi et al. | Africa, not specified | 2021 | What constitutes a palliative care need in people with serious illnesses across Africa? A mixed-methods systematic review of the concept and evidence. | To synthesise primary evidence from Africa for palliative care needs among patients and families with serious illness. |
| Chidzonga et al. | Africa, not specified | 2015 | Determinants of Oral Diseases in the African and Middle East Region. | The aim of this report is to review literature on determinants of oral diseases and apply the concepts to promoting oral health in the African countries in the African and Middle East region (AMER). |
| Lucero-Prisno et al. | Africa, not specified | 2020 | Current efforts and challenges facing responses to 2019-nCoV in Africa. | This article aims at providing a critical commentary on the current efforts against 2019-nCoV pandemic and the challenges facing its responses in the African continent. |
| Vearey et al. | Africa, not specified | 2019 | Urban health in Africa: a critical global public health priority. | This paper highlights the importance of action in the African continent for achieving global public health targets. Specifically, we argue that a focus on urban health in Africa is urgently required in order to support progress on the Sustainable Development Goals (SDGs) and other global and regional public health targets, including Universal Health Coverage (UHC), the new Urban Agenda, and the African Union’s Agenda 2063. |
| Ouedraogo et al. | Africa, overall, not country specific (review) | 2022 | A Systematic Review on Improving Health Literacy in Rural Africa Using Mobile Serious Games. | This paper reviews mobile serious games in healthcare education, especially those intended to improve health literacy in rural Africa. |
| Ezenwankwo et al. | Africa, overall | 2022 | Behavioural oncology research in Africa: Lessons from the last two decades and key considerations moving forward. | To analyse the state of behavioural oncology research in Africa and outline key considerations for future research. |
| Okereke | Africa_rural Africa | 2021 | COVID-19 Misinformation and Infodemic in Rural Africa. | There is an urgent need to investigate the overall impact of the COVID-19 pandemic in Africa as well as provide novel insights on access to information on COVID-19 in rural Africa. |
| Kickbusch | Africa, worldwide | 2001 | Health literacy: addressing the health and education divide. | Review of concepts and definitions of literacy and health literacy |
| Acheampong et al. | Africa: 43 countries | 2019 | Priority setting towards achieving under-five mortality target in Africa in context of sustainable development goals: an ordinary least squares (OLS) analysis. | The primary objective of our study was to examine the socioeconomic, healthcare, and environmental determinants that most account for U5MR disparities between African countries. |
| Petersen et al. | Africa: Ethiopia, Nigeria, South Africa, Uganda | 2017 | Strengthening mental health system governance in six low- and middle-income countries in Africa and South Asia: challenges, needs and potential strategies. | The aim of this study was to identify key governance challenges, needs and potential strategies that could facilitate adequate integration of mental health into primary health care settings in low- and middle-income countries. |
| Basu et al. | African countries | 2014 | Patient guardians as an instrument for person centered care. | not explicitly specified |
| Ramos et al. | Angola | 2022 | Building a Health Literacy Indicator from Angola Demographic and Health Survey in 2015/2016. | This study aimed to develop a health literacy indicator for Angola and to analyze pertinent demographic characteristics related to it. |
| Inegbenosun and Azodo | Benin | 2020 | Association between oral health literacy, gingival health and oral hygiene among dental patients. | To determine the association between oral health literacy, oral hygiene and gingival health status. |
| Tsekane and Amone-P'olak | Botswana | 2019 | Self-efficacy as a predictor of alcohol use among students at a University in Botswana. | This study assessed the influence of self-efficacy on alcohol use among students at a university in Botswana. |
| Banke-Thomas et al. | Burkina Faso | 2013 | Knowledge of obstetric fistula prevention amongst young women in urban and rural Burkina Faso: a cross-sectional study. | This study aims to evaluate knowledge on obstetric fistula among young women in a health district of Burkina Faso, comparing rural and urban communities. |
| Diendéré et al. | Burkina Faso | 2022 | Oral hygiene practices and their sociodemographic correlates among adults in Burkina Faso: results from the First National Survey. | This study aims to describe oral hygiene practices and associated sociodemographic factors in the Burkinabè population using the first nationally representative data. |
| Some et al. | Burkina Faso | 2022 | Interactive Voice Response Service to Improve High School Students Covid-19 Literacy in Burkina Faso: A Usability Study. | In this study, we present a Mobile based Interactive Voice Response service designed particularly for low-literate people which provides validated Covid-19 related health information in local African languages. We conducted a field study, among high school students, through a usability study to assess users' perception. |
| Moukam et al. | Cameroon | 2021 | "Cervical cancer screening: awareness is not enough". Understanding barriers to screening among women in West Cameroon-a qualitative study using focus groups. | Our first and main objective was to understand the barriers affecting women's decision-making process regarding participation in a cervical cancer screening program in the Dschang district (West Cameroon). Second, we aimed to explore the acceptability and perception of a single-visit approach (screen and treat). |
| Costa et al. | Cape Verde | 2021 | I-DECIDE: A Social Prescribing and Digital Intervention Protocol to Promote Sexual and Reproductive Health and Quality of Life among Young Cape Verdeans. | In this paper, we present a protocol of a community-based social prescribing and digital intervention to promote wellbeing and quality of life across the life course of young Cape Verdeans, with a specific focus on Sexual and Reproductive Health (SRH) related behaviors. |
| Mensah et al. | Côte d'Ivoire | 2020 | Acceptability of HPV screening among HIV-infected women attending an HIV-dedicated clinic in Abidjan, Côte d’Ivoire. | Our study aims to assess the preintervention acceptability of HPV screening among HIV-infected women in Abidjan, Côte d’Ivoire. |
| Malamba-Lez et al. | Democratic Republic of Congo | 2018 | Heart Failure Etiologies and Challenges to Care in the Developing World: An Observational Study in the Democratic Republic of Congo. | Limited data are available regarding causes and outcomes of heart failure as well as organization of care in the developing world. |
| Stroeken et al. | Eastern and Southern Africa | 2011 | HIV among out-of-school youth in Eastern and Southern Africa: a review. | a systematic review of research relating out-of-school youth and HIV seems timely |
| Almaleh et al. | Egypt | 2017 | Assessment of health literacy among outpatient clinics attendees at Ain Shams University Hospitals, Egypt: a cross-sectional study. | The aim of conducting this study is to measure health literacy (HL) and to investigate the factors associated with inadequate HL in a sample of outpatient clinics attendees (i.e. patients and companions) at Ain Shams University (ASU) Hospitals. |
| Alseratay | Egypt | 2015 | Parents' Socioeconomic Status and Health Literacy Domains among Shokrof Preparatory School Students , Shokrof Village, Algarbia Governorate, Egypt. | This study aimed to assess the correlation between parents' socioeconomic status and health literacy domains among Shokrof preparatory school students |
| Anwar et al. | Egypt | 2020 | Health literacy strengths and limitations among rural fishing communities in Egypt using the Health Literacy Questionnaire (HLQ). | The aim of this study was to use a multi-dimensional measurement tool to describe the health literacy of people living in a fishing community in northern Egypt. |
| Anwar et al. | Egypt | 2021 | Health Literacy Co-Design in a Low Resource Setting: Harnessing Local Wisdom to Inform Interventions across Fishing Villages in Egypt to Improve Health and Equity. | This study aimed to implement a co-design process as a step towards developing health literacy interventions to improve health and equity in the Borollos Lake region of northern Egypt, a low resource setting with a high prevalence of chronic diseases. |
| McEwan et al. | Egypt | 2019 | "Injustice! That is the cause": a qualitative study of the social, economic, and structural determinants of late diagnosis and treatment of breast cancer in Egypt. | We conducted a qualitative study to deepen our understanding of women's experiences with diagnosis and treatment delays and highlight nuances not identifiable in the quantitative studies. |
| Mostafa et al. | Egypt | 2021 | Is health literacy associated with antibiotic use, knowledge and awareness of antimicrobial resistance among non-medical university students in Egypt? A cross-sectional study. | This study examined the levels of health literacy (HL) and their association with antibiotic use, knowledge of antibiotics and awareness of antibiotic resistance among university students in Egypt. |
| Wahba et al. | Egypt | 2017 | Consumer-oriented evaluation of the service provided by the department of health education and information in Alexandria, Egypt. | A simple random sample of 400 participants was interviewed using an interview questionnaire assessing respondents' socioeconomic characteristics, health literacy, attitude toward health education services, and satisfaction with the health education service provided by the DHEI. |
| Ngwenya et al. | Eswatini | 2022 | Urban-Rural Differences in Depression Literacy Among High School Teachers in the Kingdom of Eswatini. | This study aims to investigate adolescent depression literacy among teachers in Eswatini and to explore the role of urbanicity |
| Asamrew et al. | Ethiopia | 2020 | Level of Patient Satisfaction with Inpatient Services and Its Determinants: A Study of a Specialized Hospital in Ethiopia. | This study was performed with the aim of assessing the level of patient satisfaction with inpatient services and its determinants in Black Lion Specialized Hospital, Addis Ababa, Ethiopia. |
| Asemahagn | Ethiopia | 2021 | Sputum smear conversion and associated factors among smear-positive pulmonary tuberculosis patients in East Gojjam Zone, Northwest Ethiopia: a longitudinal study. | This study aimed at estimating sputum smear conversion and identifying factors hindering sputum smear conversion among bacteriologically confirmed PTB cases in East Gojjam Zone, Northwest Ethiopia. |
| Asemahagn et al. | Ethiopia | 2020 | A Qualitative Insight into Barriers to Tuberculosis Case Detection in East Gojjam Zone, Ethiopia. | The objective of this study was to identify possible barriers to TCD in East Gojjam Zone, northwest Ethiopia. |
| Avan et al. | Ethiopia | 2021 | Embedding Community-Based Newborn Care in the Ethiopian health system: lessons from a 4-year programme evaluation. | Using the CHW functionality model by WHO, this study evaluates the health system response to the programme, including quality of care. |
| Ayele et al. | Ethiopia | 2019 | Magnitude and determinants for place of postnatal care utilization among mothers who delivered at home in Ethiopia: a multinomial analysis from the 2016 Ethiopian demographic health survey. | Therefore, this study assessed the magnitude and determinants for place of postnatal care service utilization among mothers who delivered at home in Ethiopia. |
| Ayode et al. | Ethiopia | 2012 | The association of beliefs about heredity with preventive and interpersonal behaviors in communities affected by podoconiosis in rural Ethiopia. | Little is known about how beliefs about heredity as a cause of health conditions might influence preventive and interpersonal behaviors among those individuals with low genetic and health literacy. |
| Chereka et al. | Ethiopia | 2022 | Digital health literacy to share COVID-19 related information and associated factors among healthcare providers worked at COVID-19 treatment centers in Amhara region, Ethiopia: A cross-sectional survey. | Therefore, this study aimed to assess digital health literacy to share COVID-19 related information and associated factors among healthcare providers who worked at COVID-19 treatment centers in the Amhara region, Northwest Ethiopia. |
| Dugasa | Ethiopia | 2022 | Level of Patient Health Literacy and Associated Factors Among Adult Admitted Patients at Public Hospitals of West Shoa Oromia, Ethiopia. | The aim of this study was to assess level of patient health literacy and associated factors among adult admitted patients at public hospitals of West Shoa zone, Oromia, Ethiopia. |
| Gedefaw et al. | Ethiopia | 2020 | Information Seeking Behavior About Cancer and Associated Factors Among University Students, Ethiopia: A Cross-Sectional Study. | This study aimed to assess cancer information seeking behavior (CISB) and its associated factors among students in Debre Tabor University, Ethiopia. |
| Gonete et al. | Ethiopia | 2021 | Malnutrition and contributing factors among newborns delivered at the University of Gondar Hospital, Northwest Ethiopia: a cross-sectional study. | To estimate the prevalence of various indicators of malnutrition (stunting, wasting, low birth weight, concurrent stunting and wasting, overweight/obesity and double burden malnutrition) among newborns and to investigate factors associated with these nutritional disorders. |
| Gurmu et al. | Ethiopia | 2018 | Factors associated with self-care practice among adult diabetes patients in West Shoa Zone, Oromia Regional State, Ethiopia. | The aim of this study was to assess factors associated with self-care practice among adult diabetes patients in public hospitals of West Shoa Zone, Oromia Regional State, Ethiopia. |
| Kassahun et al. | Ethiopia | 2016 | Diabetes related knowledge, self-care behaviours and adherence to medications among diabetic patients in Southwest Ethiopia: a cross-sectional survey. | We assessed levels of knowledge about type 2 diabetes mellitus (T2DM), self-care behaviours and adherence to medication among DM patients. |
| Kassie et al. | Ethiopia | 2022 | Information seeking about COVID-19 and associated factors among chronic patients in Bahir Dar city public hospitals, Northwest Ethiopia: a cross-sectional study. | Therefore, this study aimed to assess information seeking about COVID-19 and associated factors among chronic patients. |
| Kebede and Wabe | Ethiopia | 2012 | Medication adherence and its determinants among patients on concomitant tuberculosis and antiretroviral therapy in South west Ethiopia. | The study was designed to assess the degree of drug adherence and its determinants in patients living with HIV/AIDS and TB comorbidity. |
| Menberu et al. | Ethiopia | 2018 | Health care seeking behavior for depression in Northeast Ethiopia: depression is not considered as illness by more than half of the participants. | The aim of this study was to assess the level of professional help-seeking behavior and associated factors among individuals with depression. |
| Mengiste et al. | Ethiopia | 2021 | [Information-Seeking Behavior and Its Associated Factors Among Patients with Diabetes in a Resource-Limited Country: A Cross-Sectional Study.](https://pubmed.ncbi.nlm.nih.gov/34040402/) | This study aims to assess the diabetes information-seeking behavior and its associated factors among patients with diabetes in Debre Markos Referral Hospital, Amhara Region, Northwest Ethiopia. |
| Posso et al. | Ethiopia | 2021 | Community-level health programs and child labor: Evidence from Ethiopia. | Using Ethiopian data, we investigate if exposure to a community-level health program delivered by Health Extension Workers (HEWs) lowers child labor. |
| Shahvisi et al. | Ethiopia | 2018 | [A Human Right to Shoes? Establishing Rights and Duties in the Prevention and Treatment of Podoconiosis.](https://pubmed.ncbi.nlm.nih.gov/30008552/) | In this paper, we consider the human rights violations that cause, and are caused by, podoconiosis in Ethiopia. |
| Shiferaw et al. | Ethiopia | 2020 | E-health literacy and associated factors among chronic patients in a low-income country: a cross-sectional survey. | The aim of this study was to assess eHealth literacy level and associated factors among internet user chronic patients in North-west Ethiopia. |
| Tefera et al. | Ethiopia | 2020 | Diabetic health literacy and its association with glycemic control among adult patients with type 2 diabetes mellitus attending the outpatient clinic of a university hospital in Ethiopia. | This study was aimed to assess the diabetic health literacy level and its association with glycemic control among adult patients with type 2 diabetes mellitus attending the outpatient clinic of University of Gondar Comprehensive Specialized Hospital (UOGCSH): Northwest Ethiopia. |
| Teklu et al. | Ethiopia | 2022 | Awareness of diagnosis, treatment plan and prognosis among patients attending public hospitals and health centers in Addis Ababa, Ethiopia. | The aim of this study was to examine awareness of diagnosis, treatment plan and prognosis among patients at the time of their exit from public hospitals and health centers. |
| Tesfaye et al. | Ethiopia | 2021 | Knowledge of the community regarding mental health problems: a cross-sectional study. | This study aimed to assess the knowledge regarding mental health problems and associated factors among communities of Jimma Zone, Oromia, Ethiopia. |
| Tilahun et al. | Ethiopia | 2021 | Communicative health literacy in patients with non-communicable diseases in Ethiopia: a cross-sectional study. | Therefore, this study aimed to assess communicative health literacy and associated factors in patients with NCDs on follow-up at Jimma Medical Center (JMC), Ethiopia. |
| Tilahun et al. | Ethiopia | 2021 | Functional Health Literacy in Patients with Cardiovascular Diseases: Cross-Sectional Study in Ethiopia. | This study assessed functional health literacy and associated factors among adult patients with cardiovascular diseases (CVDs) in Ethiopia. |
| Tora et al. | Ethiopia | 2017 | Health beliefs of school-age rural children in podoconiosis-affected families: A qualitative study in Southern Ethiopia. | This study therefore aimed to explore the health beliefs of school-age rural children in podoconiosis-affected families. |
| Adu et al. | Ghana | 2021 | Mental health literacy in Ghana: Implications for religiosity, education and stigmatization. | This vignette study was conducted to explore the relationships between religiosity, education, stigmatization and MHL among Ghanaians using a sample of laypeople (N = 409) |
| Amoah | Ghana | 2018 | Social participation, health literacy, and health and well-being: A cross-sectional study in Ghana. | In particular, existing studies have not explored the relationship between social participation and health literacy and how it affects health and well-being adequately. This paper addresses this gap |
| Amoah | Ghana | 2019 | The Relationship among Functional Health Literacy, Self-Rated Health, and Social Support among Younger and Older Adults in Ghana. | It examines the impact each type of support makes on the relation between functional health literacy (FHL) and self-rated health status among younger and older adults in Ghana |
| Amoah and Phillips | Ghana | 2018 | Health literacy and health: rethinking the strategies for universal health coverage in Ghana. | However, the role of HL in the relationships between elements of UHC such as access to health care and health insurance has not been widely explored. |
| Amoah and Phillips | Ghana | 2020 | Socio-demographic and behavioral correlates of health literacy: a gender perspective in Ghana. | The present analyses examined the role of socio-economic, health and behavioral factors associated with HL among men and women in the Ashanti Region of Ghana |
| Amoah et al. | Ghana | 2022 | Health Behaviors and Health Literacy: Questing the Role of Weak Social Ties Among Older Persons in Rural and Urban Ghana. | This study investigated the moderating role of weak social ties (bridging social capital) in the relationship between health behaviors, such as smoking, alcohol intake, voluntary body check-up and physical exercise, and health literacy among older persons in rural and urban Ghana. |
| Amoah et al. | Ghana | 2022 | Association of Health Literacy and Socioeconomic Status with Oral Health Among Older Adults in Ghana: A Moderation Analysis of Social Capital. | We examined the moderating role of social capital (SC) in the association of socioeconomic status (SES) and health literacy (HL) with oral health (OH) status and the intentions to use OH services (IUOHS) among older Ghanaians. |
| Arthur et al. | Ghana | 2020 | Effectiveness of a Problem-Solving, Story-Bridge Mental Health Literacy Programme in Improving Ghanaian Community Lead~~e~~rs' Attitudes towards People with Mental Illness: A Cluster Randomised Controlled Trial. | The aim of the study was to assess the effectiveness of a mental health literacy programme in improving community leaders' attitudes toward people with mental disorders. |
| Arthur et al. | Ghana | 2020 | Cluster randomised controlled trial of a problem-solving, Story-bridge mental health literacy programme for improving Ghanaian community lead~~e~~rs' knowledge of depression. | The aim of this study was to assess the effectiveness of a problem-solving, Story-bridge mental health literacy programme, in improving community leaders' knowledge about helpful interventions for, and recognition of, depression. |
| Arthur et al. | Ghana | 2021 | Qualitative process evaluation of a problem-solving and Story-bridge based mental health literacy program with community leaders in Ghana. | The aims of our study were to evaluate the perspectives of community leaders about the usefulness of a cluster randomized trial of a problem-solving and Story-bridge based mental health literacy (MHL) programme and to understand whether they utilized the knowledge acquired from the programme in their usual interactions with people with mental illness and their families |
| Arthur et al. | Ghana | 2018 | Evaluation of a mental health literacy program on community leaders’ knowledge about and attitudes towards people with mental disorder in the Brong-Ahafo region in Ghana: Cluster randomised controlled trial (Ghana) | The broad aim of this study was to evaluate the effectiveness of a mental health literacy programme on Ghanaian assembly members’ knowledge about and attitudes toward people with mental disorders. |
| Boateng et al. | Ghana | 2020 | Translation, cultural adaptation and psychometric properties of the Ghanaian language (Akan; Asante Twi) version of the Health Literacy Questionnaire. | The HLQ has been translated and validated in diverse contexts but has so far not been assessed in any country in sub-Saharan Africa. We sought to translate this tool into the most common language used in Ghana and assess its validity. |
| Boateng et al. | Ghana | 2021 | Co-creation and prototyping of an intervention focusing on health literacy in management of malaria at community-level in Ghana. | This study used a local needs driven approach to develop a health literacy intervention for caregivers in Ghana concerning management of malaria in children under 5 years. |
| Evans et al. | Ghana | 2019 | Comprehensive Health Literacy Among Undergraduates: A Ghanaian University-Based Cross-Sectional Study. | This study aimed to ascertain the levels of health literacy and its sociodemographic determinants among undergraduate university students of Kwame Nkrumah University of Science and Technology. |
| Gupta et al. | Ghana | 2018 | Self-reported functional, communicative, and critical health literacy on foodborne diseases in Accra, Ghana. | This study, therefore, examines health literacy on foodborne diseases and the relative effects of health literacy on self-rated health. |
| Koduah et al. | Ghana | 2019 | "I Sometimes Ask Patients to Consider Spiritual Care": Health Literacy and Culture in Mental Health Nursing Practice. | This paper examines how local precepts, within culture and language, shape mental health nurses' (MHNs) practice and understanding of patients' health literacy level in Ghana. |
| Koduah et al. | Ghana | 2021 | A Comparative Analysis of Student and Practising Nurses' Health Literacy Knowledge in Ghana. | This study examined student and practising nurses' health literacy knowledge, and its correlates in Ghana |
| Kpobi and Swartz | Ghana | 2018 | Explanatory models of mental disorders among traditional and faith healers in Ghana. | With the concept of explanatory models of illness as a framework, we examined the notions of different categories of traditional and faith healers about mental disorders. |
| Kugbey et al. | Ghana | 2019 | Access to health information, health literacy and health-related quality of life among women living with breast cancer: Depression and anxiety as mediators. | This study examined the direct and indirect influences of health literacy and access to health information on the quality of life among 205 women living with breast cancer in Ghana. |
| Lori et al. | Ghana | 2016 | Use of a facilitated discussion model for antenatal care to improve communication. | To examine the usefulness and feasibility of providing focused antenatal care (FANC) in a group setting using picture cards to improve patient-provider communication, patient engagement, and improve health literacy. |
| Lori et al. | Ghana | 2017 | Improving health literacy through group antenatal care: a prospective cohort study. | To examine whether exposure to group antenatal care increased women's health literacy by improving their ability to interpret and utilize health messages compared to women who received standard, individual antenatal care in Ghana. |
| Lori et al. | Ghana | 2014 | Examining antenatal health literacy in Ghana. | To explore Ghanaian pregnant women's understanding and recognition of danger signs in pregnancy, birth preparedness and complication readiness, and their understanding of newborn care. |
| Nangsangna and Vroom | Ghana | 2019 | Factors influencing online health information seeking behaviour among patients in Kwahu West Municipal, Nkawkaw, Ghana. | This cross sectional study was conducted in the Kwahu West Municipal to determine factors influencing online health information seeking behaviours among patients. |
| Seneadza et al. | Ghana | 2022 | Neonatal jaundice in Ghanaian children: Assessing maternal knowledge, attitude, and perceptions. | As part of a project to evaluate a screening tool for NNJ, we assessed the knowledge, attitude, and perceptions of Ghanaian mothers on NNJ at baseline. |
| Tutu et al. | Ghana | 2019 | Exploring the development of a household cholera-focused health literacy scale in James Town, Accra. | This study attempts to develop and pilot a tool to measure household health literacy among the urban poor in James Town, a cholera endemic neighborhood. |
| Tutu et al. | Ghana | 2019 | Examining health literacy on cholera in an endemic community in Accra, Ghana: a cross-sectional study. | This study, therefore, assesses health literacy on cholera and the association between health literacy competency and health outcome. |
| Darteh et al. | Ghana/Kenya | 2020 | Understanding the Socio-demographic Factors Surrounding Young Peoples' Risky Sexual Behaviour in Ghana and Kenya. | The study examined risky sexual behaviours among the youth in Ghana and Kenya in relation to socio-demographic characteristics. T |
| McGinn and Allen | Guinea | 2006 | Improving refug~~e~~es' reproductive health thorough literacy in Guinea. | Adult literacy programmes, particularly literacy-for-health programmes that integrate health material in their curricula, are gaining momentum as a means to improve women's and children's health and increase women's empowerment. However, the relationship between literacy skills and these benefits remains unclear. |
| Dyrehave et al. | Guinea-Bissau | 2016 | Nonadherence is Associated with Lack of HIV-Related Knowledge: A Cross-Sectional Study among HIV-Infected Individuals in Guinea-Bissau. | assessment of adherence and HIV-related knowledge. |
| Abajobir et al. | Kenya | 2021 | The impact of i-PUSH on maternal and child health care utilization, health outcomes, and financial protection: study protocol for a cluster randomized controlled trial based on financial and health diaries data. | This study aims to evaluate the impact of i-PUSH on maternal and child health care utilization, women's health including their knowledge, behavior, and uptake of respective services, as well as women's empowerment and financial protection. It also aims to evaluate the impact of the LEAP training tool on empowering and enhancing community health volunteers' health literacy and to evaluate the impact of the M-TIBA health wallet on savings for health and health insurance uptake. |
| Kassaman et al. | Kenya | 2022 | Fear, faith and finances: health literacy experiences of English and Swahili speaking women newly diagnosed with breast and cervical cancer. | This exploratory qualitative study investigated the HL experiences of accessing and using health information in women with any stage of breast or cervical cancer presenting at the Aga Khan University Hospital (private) or Kenyatta National Hospital (public) in Nairobi, Kenya. |
| Khares et al. | Kenya | 2018 | Quality of care provided to adolescents aged between 10 and 19 years in Kenyatta National Hospital, Nairobi, Kenya | This study explored the nature of Adolescent Health Care, in both the inpatient and outpatient settings at Kenyatta National Hospital, the largest referral hospital in Kenya. |
| Marangu et al. | Kenya | 2021 | Assessing mental health literacy of primary health care workers in Kenya: a cross-sectional survey. | To assess mental health literacy of health workers in primary health care services in Kenya. |
| McMahon et al. | Kenya | 2022 | Barriers and facilitators to chemotherapy initiation and adherence for patients with HIV-associated Kap~~o~~si~~'~~s sarcoma in Kenya: a qualitative study. | The objective of this qualitative study conducted with people living with HIV-associated KS in Kenya was to identify and understand barriers and facilitators to chemotherapy initiation and adherence. |
| Muga et al. | Kenya | 2018 | A Pilot Study Exploring Nursing Knowledge of Depression and Suicidal Ideation in Kenya. | This cross-sectional study assessed mental health literacy (depression and suicidal ideation) among nurses in a private urban referral hospital in Kenya |
| Mutiso et al. | Kenya | 2018 | Changing patterns of mental health knowledge in rural Kenya after intervention using the WHO mhGAP-Intervention Guide. | This study sought to determine the feasibility of using the World Health Organization mhGAP-Intervention Guide (IG) as an educational tool for one-on-one contact in a clinical setting to increase literacy on the specified mental disorders. |
| Mwaisaka et al. | Kenya | 2021 | Young People's Experiences Using an On-Demand Mobile Health Sexual and Reproductive Health Text Message Intervention in Kenya: Qualitative Study. | The objective of this study was to explore young people's experiences using an on-demand SRH mHealth platform in Kenya. |
| Mwiti et al. | Kenya | 2019 | ‘*Bottom up*’ approach: A community-based intervention in fighting non-communicable diseases in urban informal settlements Kenya | Objective: The main objective of this study was to identify challenges faced by healthcare front-liners towards health promotion in the prevention and management of Non-Communicable Diseases (NCDs) amongst the urban 25 - 59-year olds living in urban informal settlements within Kamukunji, Nairobi County. |
| Raufman et al. | Kenya | 2020 | Environmental health literacy and household air pollution-associated symptoms in Kenya: a cross-sectional study. | Our objective was to evaluate the association between environmental health literacy (EHL), a domain of health literacy (HL) that describes the ability to use environmental health information to reduce health risks, and symptoms associated with HAP. |
| Sripad et al. | Kenya | 2022 | Determining a Trusting Environment for Maternity Care: A Framework Based on Perspectives of Women, Communities, Service Providers, and Managers in Peri-Urban Kenya. | We used a theoretically driven qualitative approach to explore trust determinants in a maternity setting across patient-provider, inter-provider, and community-policymaker interactions and relationships in peri-urban Kenya. |
| Mugomeri et al. | Lesotho | 2016 | Knowledge of disease condition and medications among hypertension patients in Lesotho. | This study evaluated the levels of knowledge of hypertension and the associated medications among hypertension patients in Lesotho and assessed the significance of these indicators on hypertension treatment outcomes |
| Reid et al. | Lesotho | 2019 | Development of a Sesotho health literacy test in a South African context. | The researchers aimed to develop an appropriate HL test for use among South African public health service users with Sesotho as their first language. |
| Brick et al. | Liberia | 2021 | Training-of-Trainers Neuroscience and Mental Health Teacher Education in Liberia Improves Self-Reported Support for Students. | The aim of this study was to determine if a program combining an understanding of neuroscience with mental health literacy content could increase teachers' awareness of students' mental health issues and produce changes in teacher attitudes and classroom practices. |
| Asgary et al. | Madagascar | 2015 | Malnutrition prevalence and nutrition barriers in children under 5 years: a mixed methods study in Madagascar. | We aimed to assess the point prevalence of childhood malnutrition in the Anivorano region, and to explore mothers' perceptions of barriers to proper nutrition |
| Harimbola and Mizumoto | Madagascar | 2018 | Individual and Household Risk Factors for Severe Acute Malnutrition among Under-Five Children in the Analamanga Region, Madagascar. | This study explores the risk factors for SAM among children hospitalized with SAM in the Analamanga region of Madagascar. |
| Jumbe et al. | Malawi | 2022 | We do not talk about it': Engaging youth in Malawi to inform adaptation of a mental health literacy intervention. | We share our experience of engaging youth in Malawi through advocacy organisations to inform cultural adaptation of a mental health literacy intervention. |
| Kalanda et al. | Malawi | 2005 | Catch-up growth in Malawian babies, a longitudinal study of normal and low birthweight babies born in a malarious endemic area. | To describe growth patterns in infants with low and normal birthweight and determine maternal risk factors for infant undernutrition. |
| Kohler et al. | Malawi | 2020 | Cohort profile: the mature adults cohort of the Malawi longitudinal study of families and health (MLSFH-MAC). | The Mature Adults Cohort of the Malawi Longitudinal Study of Families and Health (MLSFH-MAC) contributes to global ageing studies by providing a rare opportunity to study the processes of individual and population ageing, the public health and social challenges associated with ageing and the coincident shifts in disease burdens, in a low-income, high HIV prevalence, sub-Saharan African (SSA) context. |
| Kululanga et al. | Malawi | 2020 | Knowledge deficit on health promotion activities during pregnancy: the case for adolescent pregnant women at Chiladzulu District, Malawi. | Therefore, the aim of the study was to explore knowledge of pregnant adolescents on importance of antenatal care and health promotion during pregnancy. |
| Kutcher et al. | Malawi | 2017 | Clinic outcomes of the Pathway to Care Model: A cross-sectional survey of adolescent depression in Malawi. | To address this need, a Canadian-developed youth depression Pathway to Care Model, linking school-based mental health literacy interventions to training of community healthcare providers, was adapted for use in Malawi and successfully applied. |
| Kutcher et al. | Malawi | 2015 | Improving Malawian teach~~e~~rs' mental health knowledge and attitudes: an integrated school mental health literacy approach. | we culturally adapted a previously demonstrated effective Canadian school mental health curriculum resource (the Guide) for use in Malawi, the African Guide: Malawi version (AGMv), and evaluated its impact on enhancing mental health literacy for educators (teachers and youth club leaders) |
| Ogunrinu et al. | Malawi | 2017 | A qualitative study of health education experiences and self-management practices among patients with type 2 diabetes at Malamulo Adventist Hospital in Thyolo District, Malawi. | The aim of this study was to understand the perceptions and experiences of health education and self-management practices on Malamulo Adventist Hospital type 2 diabetic patients |
| Patel et al. | Malawi | 2020 | Addressing COVID-19 in Malawi. | In this commentary, we provide a quick analysis of the current state of the COVID-19 pandemic in Malawi and its efforts to address it. |
| Tilly et al. | Malawi | 2022 | [Implementation and Evaluation of Educational Videos to Improve Cancer Knowledge and Patient Empowerment.](https://pubmed.ncbi.nlm.nih.gov/35175832/) | Low health literacy is a leading cause of treatment abandonment among patients receiving cancer care at Kamuzu Central Hospital (KCH) in Malawi. |
| Uwarmahoro et al. | Malawi | 2019 | Health literacy among Malawian HIV-positive youth: a qualitative needs assessment and conceptualization. | We aimed to assess health literacy-related needs of young people living with HIV (YPLHIV) and adapt existing health literacy frameworks to the context of HIV/AIDS in Malawi |
| Ménard et al. | Morocco | 2018 | Family caregiv~~e~~rs' reported nonadherence to the controller medication of asthma in children in Casablanca (Morocco): Extent and associated factors. | This study aims 1) to assess the extent of children's nonadherence to the controller treatment of asthma in an urban region of Morocco as reported by a family caregiver, and 2) to identify the associated factors. |
| Park et al. | Morocco | 2021 | Improving Treatment Adherence with Integrated Patient Management for TB Patients in Morocco. | This study aims to examine the delivery model of TB management and the outcomes of an integrated patient management system that uses a patient-centered and community-based approach, along with mobile health technology. |
| Howard et al. | Mozambique | 2014 | Health literacy predicts pediatric dosing accuracy for liquid zidovudine. | We aimed to characterize the frequency of dosing errors for liquid zidovudine using two dosing devices and to evaluate the association between HIV literacy and dosing errors in adults living with HIV infection. |
| Lindberg et al. | Mozambique | 2021 | A qualitative study of mothers' health literacy related to malnutrition in under 5-year-old children in southern Mozambique. | To explore mothers' perceptions of malnutrition and its causes in U-5's in Mozambique, as well as their ability to recognise, prevent and act on signs of malnutrition. |
| Tique et al. | Mozambique | 2017 | Measuring Health Literacy Among Adults with HIV Infection in Mozambique: Development and Validation of the HIV Literacy Test. | The objective of this study was to develop and rigorously test the psycho-metric properties of a novel measure of health literacy for adults with HIV, the HIV Literacy Test (HIV-LT). |
| Nair et al. | multi-country approach: Benin | 2015 | Improving the Quality of Health Care Services for Adolescents, Globally: A Standards-Driven Approach. | The World Health Organization (WHO) undertook an extensive and elaborate process to develop eight Global Standards to improve quality of health care services for adolescents. The objectives of this article are to present the Global Standards and their method of development. |
| Theron et al. | multiple African countries: South Africa, Zimbabwe, Zambia, Tanzania | 2015 | [Psychological distress and its relationship with non-adherence to TB treatment: a multicentre study.](https://pubmed.ncbi.nlm.nih.gov/26126655/) | There are limited data regarding correlates of psychological distress and their association with non-adherence to anti-TB treatment. |
| Hanlon et al. | multiple countries incl Ethiopia, South Africa, Uganda | 2014 | Challenges and opportunities for implementing integrated mental health care: a district level situation analysis from five low- and middle-income countries. | The purpose was to inform development and implementation of a comprehensive district plan to integrate mental health into primary care. |
| Ramazanu et al. | multiple countries incl Malawi, Kenya | 2022 | [Challenges and Opportunities in Stroke Nursing Research: Global Views From a Panel of Nurse Researchers.](https://pubmed.ncbi.nlm.nih.gov/35532329/) | This article reflects panel insights on challenges and opportunities for nurse-led stroke research |
| Grady et al. | multiple countries incl. Algeria | 2019 | Health Care Profession~~a~~ls' Clinical Perspectives and Acceptance of a Blood Glucose Meter and Mobile App Featuring a Dynamic Color Range Indicator and Blood Sugar Mentor: Online Evaluation in Seven Countries. | To gather current self-management perceptions of HCPs in seven countries and investigate HCP satisfaction with a new glucose meter and mobile app featuring a dynamic color range indicator and a blood sugar mentor. |
| Aung et al. | multiple countries incl. Sudan | 2021 | [Community responses to COVID-19 pandemic first wave containment measures: a multinational study.](https://pubmed.ncbi.nlm.nih.gov/34516418/) | This study explored community responses to COVID-19 containment measures in different countries and synthesized a model. |
| Robertson et al. | multiple countries incl. Uganda | 2021 | [Development and Validity Assessment of a Chronic Obstructive Pulmonary Disease Knowledge Questionnaire in Low- and Middle-Income Countries.](https://pubmed.ncbi.nlm.nih.gov/33476252/) | To develop and assess the validity and reliability of a COPD-KQ among individuals with COPD in three LMIC settings. |
| Pleasant and Kuruvilla | multiple countries: incl. Ghana | 2008 | A tale of two health literacies: public health and clinical approaches to health literacy. | This article reports on an initial attempt to begin creating a measure based on the public health approach to health literacy. A brief discussion on the putative links between literacy, knowledge and health, from both clinical and public health approaches, provides a useful background for this effort. |
| Mogobe et al. | multiple countries: Botswana | 2016 | Language and Culture in Health Literacy for People Living with HIV: Perspectives of Health Care Providers and Professional Care Team Members. | The purpose of this paper was to examine the perspectives of health care providers and professional care team members regarding health literacy in HIV disease |
| McClintock et al. | multiple countries: Cameroon, Democratic Republic of the Congo, Ethiopia, Ghana, Guinea, Ivory Coast, Lesotho, Rwanda, Niger, Namibia, Sierra Leone, Swaziland, Togo and Zambia | 2020 | Constructing a measure of health literacy in Sub-Saharan African countries. | We sought to develop and evaluate a health literacy measure in a multi-national study and to examine demographic characteristics associated with health literacy. |
| Nachega et al. | multiple countries: Côte D'Ivoire, South Africa | 2012 | HIV treatment adherence, patient health literacy, and health care provider-patient communication: results from the 2010 AIDS Treatment for Life International Survey. | Little is known about patients' health literacy regarding antiretroviral therapy (ART) adherence and drug resistance and patient-provider communication about these topics. |
| Popoola | multiple countries: Nigeria | 2019 | Involving libraries in improving health literacy to achieve Sustainable Development Goal-3 in developing economies: a literature review. | The review focused on identifying actions that can be implemented by libraries to enhance health literacy and access to information among health care practitioners and consumers to support the achievement of SDG-3 in developing countries, especially Nigeria. |
| Weist et al. | multiple countries: Liberia | 2017 | [School Mental Health Promotion and Intervention: Experiences from Four Nations](https://eric.ed.gov/?q=abstract%3a+%22health+literacy%22+AND+(Afric*+OR+Afriq*+OR+Algeria*+OR+Angola*+OR+Benin*+OR+Botswana*+OR+Burkin*+OR+%e2%80%9cBurkina+Faso%e2%80%9d+OR+Burundi*+OR+%e2%80%9cCape+Verde*%e2%80%9d+OR+%e2%80%9cCabo+Verde*%e2%80%9d+OR+Verde*+OR+Cameroon*+OR+Chad*+OR+%e2%80%9cCentral+African*%e2%80%9d+OR+%e2%80%9cCentral+African+Republic%e2%80%9d+OR+Comor*+OR+Congo*+OR+DRC+OR+%e2%80%9cDemocratic+Republic+Congo%e2%80%9d+OR+Djibouti*+OR+Egypt*+OR+Equato*+OR+Eritrea*+OR+Eswatini+OR+Swazi*+OR+Ethiopia*+OR+Gabon*+OR+Gambia*+OR+Ghana*+OR+Guinea*+OR+Guinea-Bissau+OR+Guinea-Bissau*+OR+Bissau-Guinean*+OR+%22Ivory+Coast%22+OR+Ivorian*+OR+%e2%80%9cC%c3%b4te+d%e2%80%99Ivoire%e2%80%9d+OR+Kenya*+OR+Lesotho+OR+Basotho*+OR+Liberia*+OR+Libya*+OR+Madagasca*+OR+Malagasy*+OR+Malawi*+OR+Mali+OR+Malian*+OR+Mauritania*+OR+Mauriti*+OR+Morocc*+OR+Mozambi*+OR+Namibia*+OR+Niger*+OR+Nigeria*+OR+Rwanda*+OR+%22S%c3%a3o+Tom%c3%a9%22+OR+%22Sao+Tom*%22OR+Senegal*+OR+Seychell*+OR+Sierra+Leon*+OR+Somali*+OR+%22South+Africa*%22OR+%22South+Sudan*%22+OR+Sudan*+OR+Tanzania*+OR+Togo*+OR+Tunisia*+OR+Uganda*+OR+Zambia*+OR+Zimbabwe*)+NOT+%22African+American*%22&pg=2&id=EJ1151228) | In this article we provide general background on SMH in four nations, two showing strong progress (the United States and Canada), one showing moderate progress (Norway), and one beginning the work (Liberia). Following general background for each country, actions in relation to the SMHILE themes are reviewed. The article concludes with plans and ideas for future global collaboration towards advancement of the SMH field. |
| Bowser et al. | multiple countries: MENA: Egypt, North Africa + UAE | 2017 | Health system barriers and enablers to early access to breast cancer screening, detection, and diagnosis: a global analysis applied to the MENA region. | To identify barriers and enablers that impact access to early screening, detection, and diagnosis of breast cancer both globally and more specifically in the Middle East and North Africa (MENA) region (with a specific focus on Egypt, Jordan, Oman, Saudi Arabia, United Arab Emirates [UAE], and Kuwait) with a specific focus on the health system. |
| Kutcher et al. | Multiple countries: Malawi, Tanzania | 2019 | Creating Evidence-Based Youth Mental Health Policy in Sub-Saharan Africa: A Description of the Integrated Approach to Addressing the Issue of Youth Depression in Malawi and Tanzania. | We here describe an innovative approach that addresses these issues simultaneously while concurrently strengthening key mental health components in existing education and health-care systems as successfully applied in Malawi and replicated in Tanzania |
| Hirvonen et al. | Multiple countries: Namibia | 2020 | Screening everyday health information literacy among four populations. | This study aims to examine the applicability of a multidimensional Everyday Health Information Literacy (EHIL) screening tool in detecting people with challenges in accessing, understanding, evaluating and using health information in everyday situations. |
| Pavarini et al. | Multiple countries: Nigeria, South Africa, Burundi | 2022 | Agents of Change for Mental Health: A Survey of Young People's Aspirations for Participation Across Five Low- and Middle-Income Countries. | To identify pathways for young people's participation in promoting MHWB in low- and middle-income countries (LMICs), this study surveyed young people's aspirations for engagement, their spheres of influence, capacity building needs, and key barriers to participation. |
| Sytre et al. | Multiple countries: Burkina Faso, Cabo Verde, Guinea-Bissau, Ivory Coast, Sierra Leone | 2021 | Revisiting COVID-19 Communication in Western Africa: A Health Literacy-based Approach to Health Communication. | We conducted a quantitative socio-anthropological study of the knowledge of the severe acute respiratory syndrome coronavirus 2 (SARS-CoV-2) infection and perception of the prevention messages in Burkina Faso, Cabo Verde, Guinea-Bissau, Ivory Coast, and Sierra Leone. |
| Al-Rousan et al. | Multiple countries: Cameroon, Malawi | 2020 | [Patients' perceptions of self-management of high blood pressure in three low- and middle-income countries: findings from the BPMONITOR study.](https://pubmed.ncbi.nlm.nih.gov/32742666/) | Self-management of high blood pressure (BP) through self-monitoring and self-titration of medications, has proved to be one successful and cost-effective tool to achieve better BP control in many high-income countries but not much is known about its potential in low- and middle-income countries (LMICs). |
| Louyeh et al. | Multiple countries: Nigeria, Egypt, Malawi, Ghana, | 2020 | Patterns of the Social Approach to Health in Selected Countries and Iran: A Comparative Study. | This comparative study aimed at examining the patterns of the social approach to health in 9 selected countries. |
| Velden et al. | Multiple countries: South Africa | 2014 | [Patients with Sore Throat: A Survey of Self-Management and Healthcare-Seeking Behavior in 13 Countries Worldwide.](https://pubmed.ncbi.nlm.nih.gov/32982537/) | The objective of this study was to investigate patients' attitudes related to healthcare-seeking behavior and self-management of sore throat. |
| Austvoll-Dahlgren et al. | Multiple countries: Uganda | 2017 | [Measuring ability to assess claims about treatment effects: a latent trait analysis of items from the 'Claim Evaluation Tools' database using Rasch modelling.](https://pubmed.ncbi.nlm.nih.gov/28550019/) | To describe the development of the Claim Evaluation Tools, a set of flexible items to measure people's ability to assess claims about treatment effects. |
| Korhonen et al. | Multiple countries: South Africa / Zambia | 2022 | Construct validity and internal consistency of the revised Mental Health Literacy Scale in South African and Zambian contexts. | The aim of this study was to evaluate the construct validity and internal consistency of the revised Mental health literacy Scale (MHLS) in South Africa (SA) and Zambia. |
| Lahti et al. | Multiple countries: South Africa / Zambia | 2020 | Design and Development Process of a Youth Depression Screening m-Health Application for Primary Health Care Workers in South Africa and Zambia: An Overview of the MEGA Project. | In phase one, we will investigate the mental health literacy of PHC practitioners to identify areas in need of development. |
| Kagee et al. | Multiple countries: Southern Africa | 2011 | Structural barriers to ART adherence in Southern Africa: Challenges and potential ways forward. | not explicitly specified |
| Paschen-Wolff et al. | Multiple countries Southern Africa: Botswana, Namibia, South Africa, Zimbabwe | 2020 | HIV and sexually transmitted infection knowledge among women who have sex with women in four Southern African countries. | This study examined the demographic and social factors contributing to female-to-female STI/HIV transmission knowledge among Southern African women who have sex with women using an integrated model of health literacy. |
| Laisser et al. | Multiple countries: Tanzania / Zambia | 2022 | The tipping point of antenatal engagement: A qualitative grounded theory in Tanzania and Zambia. | To gain understanding of women's antenatal experiences in Tanzania and Zambia, and the factors that influence antenatal engagement. |
| Bedrosian et al. | Multiple countries: West Africa | 2016 | Lessons of Risk Communication and Health Promoti~~o~~n - West Africa and United States. | not explicitly specified |
| Fowler et al. | Multiple countries: West Africa | 2014 | Caring for critically ill patients with Ebola virus disease. Perspectives from West Africa. | not explicitly specified |
| Munangatire et al. | Namibia | 2022 | Nursing stude~~n~~ts' understanding of health literacy and health practices: a cross-sectional study at a university in Namibia. | This study explored nursing students' understanding of the concept of ' health literacy' and their health practices at a university in Namibia. |
| Li et al. | Niger | 2016 | Using WeChat official accounts to improve malaria health literacy among Chinese expatriates in Niger: an intervention study. | Health education is a recommended intervention for prevention of malaria among non-immune travellers and expatriate workers. It is urgent to develop an effective and feasible way for these populations to obtain information about the prevention and treatment of malaria. |
| Abaraogu et al. | Nigeria | 2016 | Work-related back discomfort and associated factors among automotive maintenance mechanics in Eastern Nigeria: A cross sectional study. | To investigate the prevalence, pattern and severity of back pain among automotive maintenance mechanics, as well as the personal and job variables associated with or predicting occurrence of back pain. |
| Abiodun et al. | Nigeria | 2011 | Detecting child psychiatric disorders during routine clinic work: A pre-interventional study of primary care physicians in Ilorin, Nigeria | To explore the existing level of ability of PCPs in our primary care unit to identify children with mental health problems. |
| Adanri et al. | Nigeria | 2017 | Maternal health literacy, antenatal care, and pregnancy outcomes in Lagos, Nigeria. | Guided by the social cognitive theory and health belief model, the purpose of this cross-sectional quantitative study was to determine if there is a relationship between maternal health literacy, antenatal care visits, development of medical conditions during pregnancy, and pregnancy outcomes (measured by healthy or unhealthy baby) in Lagos, Nigeria. |
| Adedimeji et al. | Nigeria | 2017 | Improving outcomes in cancer diagnosis, prevention and control: barriers, facilitators and the need for health literacy in Ibadan Nigeria. | Studies suggest increasing health literacy and empowering individuals to take preventive action will improve outcomes and mitigate impact on a weak health system. |
| Adefabi | Nigeria | 2018 | Inclusive economic growth: the pathway to sustainable development | This paper therefore examines conceptual issues in inclusive economic growth and submits that among its major impediments in Nigeria are deficient physical infrastructure, bleak economic situation and financial exclusion, among others |
| Adekoya-Cole et al. | Nigeria | 2015 | Poor Health Literacy in Nigeria: Causes, Consequences and Measures to improve it. | This review aims to discuss the factors that influence health literacy, effects of low health literacy on the individual and on the community and to proffer measures on how to improve health literacy in our communities |
| Ajuwon and Ajuwon | Nigeria | 2019 | Teaching high school students to use online consumer health resources on mobile phones: outcome of a pilot project in Oyo State, Nigeria. | This project evaluated the outcomes of training high school students to deliver consumer health information to their peers. |
| Akangbe et al. | Nigeria | 2015 | An assessment of health practises among small-scale farmers in Kwara State, Nigeria. | The study examines the personal health practices of small scale farmers in Kwara State, Nigeria. |
| Al-Mujtaba et al. | Nigeria | 2020 | Assessing the acceptability of village health work~~e~~rs' roles in improving maternal health care in Gombe State, Nigeria a qualitative exploration from women beneficiaries. | We assessed the acceptability of VHW services among women beneficiaries of the Program. |
| Aluh et al. | Nigeria | 2018 | Mental health literacy among Nigerian teachers. | This study aims to assess mental health literacy among teachers with focus on their knowledge of depression. |
| Aluh et al. | Nigeria | 2019 | Cross-sectional survey of mental health literacy among undergraduate students of the University of Nigeria. | This study sought to assess knowledge of schizophrenia and help-seeking behaviour among undergraduate students of a Nigerian university. Sociodemographic predictors of correct recognition were also explored. |
| Aluh et al. | Nigeria | 2020 | Comparison of pharmaci~~s~~ts' mental health literacy: Developed versus developing countries. | To compare the mental health literacy (MHL) of pharmacists in Nigeria and their comfort rendering pharmacy services to patients with mental illness with that of pharmacists in developed countries. |
| Aluh et al. | Nigeria | 2018 | Mental health literacy: what do Nigerian adolescents know about depression? | While there is a growing literature on the mental health literacy of adults, there has not been a parallel interest in the mental health literacy of young people in Nigeria. |
| Anchang & Mbunwe | Nigeria | 2019 | A stated preference discrete choice health literacy intervention framework for the control of non-communicable diseases (NCDs) in Africa. |  |
| Arulogun et al. | Nigeria | 2016 | Experience of Using an Interdisciplinary Task Force to Develop a Culturally Sensitive Multipronged Tool to Improve Stroke Outcomes in Nigeria. | This paper describes the unique experience in Sub-Saharan Africa of utilizing of an interdisciplinary Task Force to facilitate the development of the multipronged behavioral intervention aimed at enhancing stroke outcomes in a low-middle income country. |
| Atilola and Olayiwola | Nigeria | 2012 | The Nigerian home video boom: should Nigerian psychiatrists be worried? Lessons from content review and views of community dwellers. | To assess the popularity of Nigerian home videos among Nigerian community dwellers and the frequency of their exposure to scenes depicting mental illness. |
| Atiloloa and Olayiwola | Nigeria | 2011 | Stigmatisation of mental illness in Nigerian home videos. | In an effort to answer these questions, community dwellers participating in a 2009 public health campaign in Ibadan, Nigeria, were asked via in-person interviews how often they see scenes depicting “madness” in Nigerian films and about their views of the accuracy of such depictions. |
| Bella-Awusah et al. | Nigeria | 2014 | The impact of a mental health teaching programme on rural and urban secondary school students' perceptions of mental illness in southwest Nigeria. | This study aimed to assess the impact of a school based mental health awareness programme aimed at increasing mental health literacy and reducing negative views about persons with mental illness. |
| Dogra et al. | Nigeria | 2012 | Nigerian secondary school child~~r~~en's knowledge of and attitudes to mental health and illness. | To establish the views and knowledge about mental health and illness in pupils at four secondary schools in rural and urban Southwest Nigeria. |
| Eguzo and Camazine | Nigeria | 2013 | Beyond limitations: practical strategies for improving cancer care in Nigeria. | Despite the rising incidence and public health importance, Nigeria lacks an organized and comprehensive strategy to deal with cancers.(...) This review led to the formulation of a proposal for Nigerian National Cancer Policy, mainly drawn from effective strategies used in Canada, Brazil and Kenya. |
| Etokidem et al. | Nigeria | 2021 | Potential barriers to and facilitators of civil society organization engagement in increasing immunization coverage in Odukpani Local Government Area of Cross River State, Nigeria: an implementation research. | This study explored the potential barriers to and facilitators of CSO engagement in increasing immunization coverage in Odukpani Local Government Area of Cross River State, Nigeria. |
| Eze et al. | Nigeria | 2016 | [Public's knowledge of the differences between ophthalmologists and optometrists: a critical issue in eye care service utilisation.](https://pubmed.ncbi.nlm.nih.gov/27672602/) | To assess the public's knowledge of the differences between ophthalmologists and optometrists and identify the factors associated with knowledge. |
| Famuyiwa and Entwistle | Nigeria | 2021 | Characterising and communicating the potential hazard posed by potentially toxic elements in indoor dusts from schools across Lagos, Nigeria. | The aim of the study was to assess the potential hazard posed by PTE in indoor dusts and to develop a suitable risk communication strategy to inform and educate the public, promoting environmental health literacy. |
| Gabriel et al. | Nigeria | 2021 | Feasibility of a socio-spiritual intervention to improve quality of life of adult Nigerians with cancer and their family caregivers: Protocol for a randomised controlled trial. | This protocol tests the feasibility of a randomised controlled trial on the efficacy of a socio-spiritual intervention to improve the quality of life of adult Nigerians living with cancer and their family caregivers. |
| Gabriel et al. | Nigeria | 2021 | [Quality of life and associated factors among adults living with cancer and their family caregivers.](https://pubmed.ncbi.nlm.nih.gov/33605071/) | This study examined the association of needs, health literacy, and quality of life among adult Nigerians with cancer and family caregivers |
| Hamilton-Ekeke et al. | Nigeria | 2020 | [Health Literacy in the Promotion of Wellness among Secondary School Students in Bayelsa State, Nigeria](https://eric.ed.gov/?q=abstract%3a+%22health+literacy%22+AND+(Afric*+OR+Afriq*+OR+Algeria*+OR+Angola*+OR+Benin*+OR+Botswana*+OR+Burkin*+OR+%e2%80%9cBurkina+Faso%e2%80%9d+OR+Burundi*+OR+%e2%80%9cCape+Verde*%e2%80%9d+OR+%e2%80%9cCabo+Verde*%e2%80%9d+OR+Verde*+OR+Cameroon*+OR+Chad*+OR+%e2%80%9cCentral+African*%e2%80%9d+OR+%e2%80%9cCentral+African+Republic%e2%80%9d+OR+Comor*+OR+Congo*+OR+DRC+OR+%e2%80%9cDemocratic+Republic+Congo%e2%80%9d+OR+Djibouti*+OR+Egypt*+OR+Equato*+OR+Eritrea*+OR+Eswatini+OR+Swazi*+OR+Ethiopia*+OR+Gabon*+OR+Gambia*+OR+Ghana*+OR+Guinea*+OR+Guinea-Bissau+OR+Guinea-Bissau*+OR+Bissau-Guinean*+OR+%22Ivory+Coast%22+OR+Ivorian*+OR+%e2%80%9cC%c3%b4te+d%e2%80%99Ivoire%e2%80%9d+OR+Kenya*+OR+Lesotho+OR+Basotho*+OR+Liberia*+OR+Libya*+OR+Madagasca*+OR+Malagasy*+OR+Malawi*+OR+Mali+OR+Malian*+OR+Mauritania*+OR+Mauriti*+OR+Morocc*+OR+Mozambi*+OR+Namibia*+OR+Niger*+OR+Nigeria*+OR+Rwanda*+OR+%22S%c3%a3o+Tom%c3%a9%22+OR+%22Sao+Tom*%22OR+Senegal*+OR+Seychell*+OR+Sierra+Leon*+OR+Somali*+OR+%22South+Africa*%22OR+%22South+Sudan*%22+OR+Sudan*+OR+Tanzania*+OR+Togo*+OR+Tunisia*+OR+Uganda*+OR+Zambia*+OR+Zimbabwe*)+NOT+%22African+American*%22&id=EJ1258146) | The study determined the level of health literacy in terms of knowledge of drug abuse as well as its application in making healthy decisions among secondary school students in Ogbia Local Government Area of Bayelsa State, Nigeria |
| Igwesi-Chidobe et al. | Nigeria | 2020 | Evidence, theory and context: using intervention mapping in the development of a community-based self-management program for chronic low back pain in a rural African primary care setti~~ng~~–g - the good back program. | This paper presents the application of the intervention mapping (IM) approach in the development of a complex behavior change intervention - The Good Back program, aimed at reducing non-specific chronic low back pain (CLBP) disability in rural Nigeria. |
| Ikwuka et al. | Nigeria | 2016 | Ideological vs. Instrumental Barriers to Accessing Formal Mental Health care in the Developing World: Focus on South-eastern Nigeria. | The study aimed to establish the relative weight, significance and determinants of instrumental and ideological barriers for prioritised policy interventions |
| Kuyinu et al. | Nigeria | 2020 | Health literacy: Prevalence and determinants in Lagos State, Nigeria. | The study was conducted to measure the prevalence of health literacy and its determinants among Lagos State residents. |
| Liu et al. | Nigeria | 2020 | Enhancing Knowledge in Informal Settlements: Assessing Health Beliefs and Behaviors in Nigeria: A cross-sectional survey assessment of perceptions, practices, and resources in underserved urban communities in Lagos. | This project aimed to determine the baseline level of health literacy, behavioral practices, and accessibility to resources in a set of 16 informal settlements located around Lagos, Nigeria in order to identify topics that should be emphasized in a new teaching curriculum directed at local Community Health Educators. |
| Mojoyinola | Nigeria | 2011 | Influence of Maternal Health Literacy on Healthy Pregnancy and Pregnancy Outcomes of Women Attending Public Hospitals in Ibadan, Oyo State, Nigeria Abstract ... | The present study investigated the influence of maternal health literacy on healthy pregnancy and pregnancy outcomes |
| Nwaozuru et al. | Nigeria | 2020 | Addressing Stroke Literacy in Nigeria Through Music: A Qualitative Study of Community Perspectives | We sought to understand community-level perspectives on using African music to promote acute stroke literacy. |
| Obaremi and Olatokun | Nigeria | 2021 | A survey of health information source use in rural communities identifies complex health literacy barriers. | The study assessed sources and challenges concerning health information access and use among residents of five rural communities in Ibadan, Nigeria. |
| Obasola and Mabawonku | Nigeria | 2018 | Moth~~e~~rs' perception of maternal and child health information disseminated via different modes of ICT in Nigeria. | To investigate mothers' perceived usefulness of ICT and MCH information disseminated through e-health projects in Nigeria. |
| Ofole and Ohakwe | Nigeria | 2021 | [Therapeutic Outcome of Self-Control and Social Interaction Interventions on Negative Body Image among In-School Adolescents with Low Health Literacy in Southwest Nigeria](https://eric.ed.gov/?q=abstract%3a+%22health+literacy%22+AND+(Afric*+OR+Afriq*+OR+Algeria*+OR+Angola*+OR+Benin*+OR+Botswana*+OR+Burkin*+OR+%e2%80%9cBurkina+Faso%e2%80%9d+OR+Burundi*+OR+%e2%80%9cCape+Verde*%e2%80%9d+OR+%e2%80%9cCabo+Verde*%e2%80%9d+OR+Verde*+OR+Cameroon*+OR+Chad*+OR+%e2%80%9cCentral+African*%e2%80%9d+OR+%e2%80%9cCentral+African+Republic%e2%80%9d+OR+Comor*+OR+Congo*+OR+DRC+OR+%e2%80%9cDemocratic+Republic+Congo%e2%80%9d+OR+Djibouti*+OR+Egypt*+OR+Equato*+OR+Eritrea*+OR+Eswatini+OR+Swazi*+OR+Ethiopia*+OR+Gabon*+OR+Gambia*+OR+Ghana*+OR+Guinea*+OR+Guinea-Bissau+OR+Guinea-Bissau*+OR+Bissau-Guinean*+OR+%22Ivory+Coast%22+OR+Ivorian*+OR+%e2%80%9cC%c3%b4te+d%e2%80%99Ivoire%e2%80%9d+OR+Kenya*+OR+Lesotho+OR+Basotho*+OR+Liberia*+OR+Libya*+OR+Madagasca*+OR+Malagasy*+OR+Malawi*+OR+Mali+OR+Malian*+OR+Mauritania*+OR+Mauriti*+OR+Morocc*+OR+Mozambi*+OR+Namibia*+OR+Niger*+OR+Nigeria*+OR+Rwanda*+OR+%22S%c3%a3o+Tom%c3%a9%22+OR+%22Sao+Tom*%22OR+Senegal*+OR+Seychell*+OR+Sierra+Leon*+OR+Somali*+OR+%22South+Africa*%22OR+%22South+Sudan*%22+OR+Sudan*+OR+Tanzania*+OR+Togo*+OR+Tunisia*+OR+Uganda*+OR+Zambia*+OR+Zimbabwe*)+NOT+%22African+American*%22&id=EJ1329179) | This study examined the effectiveness of Self-Control Therapy (SCT) and Social Interaction Skills Training (SIST) in managing negative body image among senior secondary school students with low health literacy in Southwest Nigeria. |
| Ogunrin et al. | Nigeria | 2019 | Genomic Literacy and Awareness of Ethical Guidance for Genomic Research in Sub-Saharan Africa: How Prepared Are Biomedical Researchers? | challenging South Africa that disproportionately affects women in the country, |
| Ohaeri and Fido | Nigeria | 2001 | The opinion of caregivers on aspects of schizophrenia and major affective disorders in a Nigerian setting. | To assess the opinion of relatives of 75 schizophrenics and 20 major affective disorder cases on aspects of the disease and compare with the responses of relatives of cancer, infertility and sickle cell disease (SCD) cases. |
| Oladunjoye et al. | Nigeria | 2013 | Health Literacy Amongst Tuberculosis Patient in a General Hospital | This study aims to bridge the existing knowledge gap by assessing health literacy among patients with TB in a rural town in Northern Nigeria. |
| Olusegun | Nigeria | 2019 | The Roles of Yoruba Songs on Pregnancy, Labour and Baby Care in Antenatal and Postnatal Clinic in Southwestern Nigerian Hospital | This paper therefore, examines the roles of Yoruba health related songs on pregnancy, labour, delivery and baby care during the health literacy classes in selected hospitals in southwestern Nigeria |
| Sokefun and Atulomah | Nigeria | 2020 | Predictors of infant-survival practices among mothers attending paediatric clinics in Ijebu-Ode, Ogun State, Nigeria. | This study was undertaken to provide better understanding of the dynamics of predictors of infant-survival practices among mothers with infants attending paediatric clinics. |
| Ukpabi | Nigeria | 2021 | Relationship among health literacy, superstitious/cultural beliefs, and self-care among diabetic patients in Warri, Nigeria. | This study was conducted to determine the moderating effects of superstitious or cultural beliefs on the relationship between health literacy and self-care adoption among diabetes patients in Warri, Nigeria. |
| Ukwenya et al. | Nigeria | 2021 | COVID-19 health literacy, coping strategies and perception of COVID-19 containment measures among community members in a southwestern state in Nigeria. | This study aimed to describe COVID-19 health literacy, coping strategies and perception of COVID-19 containment measures among community members in a Southwestern state in Nigeria. |
| Uwatt et al. | Nigeria | 2010 | Literacy and Health Seeking Behaviours among Patients in Benue and Cross River States of Nigeria | determine the relationship between outpatients literate status and their health seeking behaviour |
| Väisänen et al. | Nigeria | 2021 | Sexual and Reproductive Health Literacy, Misoprostol Knowledge and Use of Medication Abortion in Lagos State, Nigeria: A Mixed Methods Study. | Little is known about the link between health literacy and women's ability to safely and successfully use misoprostol to self-induce an abortion. |
| Mbada et al. | Nigeria (Yoruba) | 2022 | Cultural adaptation and psychometric evaluation of the Yoruba version of the Health Literacy Questionnaire. | The objective of this study was to culturally adapt and establish the psychometric properties of the Yoruba version of the health literacy Questionnaire. |
| Cubaka et al. | Rwanda | 2018 | He should feel your pain': Patient insights on patient-provider communication in Rwanda. | This study explored patients' communication preferences and perceptions on what factors influence the patient-provider communication in primary health care settings in Rwanda. |
| Ingabire et al. | Rwanda | 2016 | Using an intervention mapping approach for planning, implementing and assessing a community-led project towards malaria elimination in the Eastern Province of Rwanda. | This paper describes development, implementation and evaluation of a community-based malaria elimination project in Ruhuha sector, Bugesera district, Eastern province of Rwanda. |
| Linden et al. | Rwanda | 2016 | Validation of a community-based survey assessing nonobstetric surgical conditions in Burera District, Rwanda. | The goal of this study was to create and assess the validity of a community-based questionnaire collecting data on untreated surgically correctable disease throughout Burera District, Rwanda, to accurately plan for surgical services at a district hospital. |
| Lygidakis et al. | Rwanda | 2019 | Community- and mHealth-based integrated management of diabetes in primary healthcare in Rwanda (D²Rwanda): the protocol of a mixed-methods study including a cluster randomised controlled trial. | The D²Rwanda study aims at: (a) determining the efficacy of an integrated programme for the management of diabetes in Rwanda, which will provide monthly patient assessments by HBCPs, and an educational and self-management mHealth patient tool, and; (b) exploring qualitatively the ways the interventions will have been enacted, their challenges and effects, and changes in the patients' health behaviours and HBCPs' work satisfaction. |
| Mukanoheli et al. | Rwanda | 2020 | Functional Health Literacy and Self-Care Behaviors Among Type 2 Diabetic Patients at a University Teaching Hospital in Kigali Abstract PDF ... | To determine if functional health literacy is associated with self-care behaviors among T2DM patients. |
| Umubyeyi et al. | Rwanda | 2016 | Help-seeking behaviours, barriers to care and self-efficacy for seeking mental health care: a population-based study in Rwanda. | Mental disorders commonly affect young people but usually go unrecognized and untreated. This study aimed to investigate help-seeking behaviours, barriers to care and self-efficacy for seeking mental health care among young adults with current depression and/or suicidality in a low-income setting. |
| Dieng et al. | Senegal | 2020 | Moth~~e~~rs' oral health literacy and child~~r~~en's oral health status in Pikine, Senegal: A pilot study. | The objective of this study is to estimate the level of mothers' OHL in Senegal and its relation to the dental health of their children. |
| Glik et al. | Senegal | 2016 | Health-related media use among youth audiences in Senegal. | The purpose of this study was to better understand how younger audiences are navigating traditional and newer forms of media technologies, with particular emphasis on the skills and competencies needed to obtain, evaluate and apply health-related information, also defined as health and media literacy. |
| Kim et al. | Senegal | 2019 | The Role of Health Literacy in Family Planning Use among Senegalese Women. | In this research, we investigate health literacy as an auxiliary component of health communication. We test the validity of the health literacy Skills Framework by examining the correlation of health literacy indicators to family planning use among Senegalese women in the 2014 Demographic Health Survey |
| Kennedy et al. | Sierra Leone | 2022 | Factors associated with adherence to treatment in patients with open angle glaucoma in Sierra Leone, West Africa: patient demographics and questionnaire. | We aim to establish the factors contributing to late presentation, treatment non-adherence and disease progression in glaucoma patients in Sierra Leone. |
| Keles et al. | Somalia | 2021 | Clinical characteristics of acute liver failure associated with hepatitis A infection in children in Mogadishu, Somalia: a hospital-based retrospective study. | The aim of the study was therefore to investigate the Hepatitis A infection and its rare complication of acute liver failure in children in Somalia. |
| Aggarwal et al. | South Africa | 2017 | Evaluation of modified patient health questionnaire-9 teen in South African adolescents. | This report describes the findings of the survey conducted by South African Depression and Anxiety Group (SADAG) in a cohort of disadvantaged South African adolescent scholars in which PHQ-9 teen version was modified and adapted (PHQ-9M) to improve the response rate. |
| Aggarwal et al. | South Africa | 2016 | South African adolescents' beliefs about depression. | This study explores the depression literacy in adolescents in South Africa. |
| Andersson et al. | South Africa | 2013 | Help-seeking behaviour, barriers to care and experiences of care among persons with depression in Eastern Cape, South Africa. | Little is known about the help-seeking behaviour and barriers to care among people with depression in poor resource settings in Sub-Saharan Africa. |
| Babatunde et al. | South Africa | 2020 | Stakeholders' perceptions of child and adolescent mental health services in a South African district: a qualitative study. | Hence this study sought to explore multisectoral dynamics in providing CAMH care in one resource-constrained South African district as a case study, towards informing the development of a model for district mental health plan and generating lessons for mental health systems strengthening to support CAMH services using the Health Systems Dynamics (HSD) framework. |
| Babatunde et al. | South Africa | 2022 | Identifying multilevel and multisectoral strategies to develop a Theory of Change for improving child and adolescent mental health services in a case-study district in South Africa. | Together with key stakeholders across multiple sectors, this study aims to (i) co-identify causal factors and potential strategies to overcome bottlenecks in one district in SA as a case study; and (ii) Co-develop a Theory of Change (ToC) for increasing access to CAMH services within the resource constraints of a remote resource-scarce district as a case study. |
| Bennin and Rother | South Africa | 2017 | ["But it's just paracetamol": Caregivers' ability to administer over-the-counter painkillers to children with the information provided.](https://pubmed.ncbi.nlm.nih.gov/25544245/) | Objective: To determine whether caregivers are able to make informed decisions about their families' use of over-the-counter (OTC) painkillers through access to and use of three mechanisms of information provision. |
| Bobbins et al. | South Africa | 2019 | Balanced nutrition and hand hygiene for children in South Africa. | The aim of this research was to design and implement a participatory health promotion intervention for caregivers at the Rhodes Day Care Centre (RDCC) that highlighted these important public health issues. |
| Braathen et al. | South Africa | 2013 | Understanding the local context for the application of global mental health: a rural South African experience. | It is only through rich and detailed understandings of local contexts and individual experiences that the challenges global mental health faces can be fully appreciated. |
| Campbell et al. | South Africa | 2021 | Evaluating Community Engagement Strategies to Manage Stigma in Two African Genomics Studies Involving People Living with Schizophrenia or Rheumatic Heart Disease. | This article reports on community engagement evaluation strategies in two African genomics studies: the Stigma in African Genomics Research study and the Genomics of Schizophrenia in South African Xhosa People (SAX) study. |
| Clarke and Voss | South Africa | 2016 | The role of a multidisciplinary student team in the community management of chronic obstructive pulmonary disease. | To determine whether a community-based, multidisciplinary team consisting of home-based caregivers and supervised students could improve the functional status and quality of life of patients living with chronic obstructive pulmonary disease (COPD) in a low-income, peri-urban setting in South Africa |
| Davis and Jansen | South Africa | 2021 | Deploying a Fotonovela to Combat Methamphetamine Abuse among South Africans with Varying Levels of Health Literacy. | In the first part of a two-part study, we compared a health-related fotonovela about MA to an existing brochure group and a control group. |
| De et al | South Africa | 2012 | Maximizing health literacy and client recall in a developing context: speech-language therapist and client perspectives. | This study aimed to investigate (1) issues around clients' health literacy and recall of information; and (2) how these issues can be overcome in speech-language therapy in a developing context. |
| Delphine et al. | South Africa | 2010 | Explanatory models of mental disorders and treatment practices among traditional healers in Mpumalanga, South Africa. | The present study examines traditional healers' explanatory models (EMs) and treatment practices for psychotic and non-psychotic mental illnesses. |
| Devillé and Tempelman | South Africa | 2019 | Feasibility and robustness of an oral HIV self-test in a rural community in South-Africa: An observational diagnostic study. | The primary objective of this study was to evaluate the ability of untrained persons to correctly interpret the OraQuick HIV Self-Test results with oral fluid compared with results obtained by trained users using the matched lot OraQuick Rapid HIV-1/2 Antibody Test and blinded to the results of the Self-Test. |
| Dowse et al. | South Africa | 2010 | Applicability of the REALM health literacy test to an English second-language South African population. | To investigate health literacy in an English second language population using the REALM test, to evaluate its appropriateness and to compare health literacy between four different education categories. |
| Ducray et al. | South Africa | 2021 | Cervical cancer knowledge and screening uptake by marginalized population of women in inner-city Durban, South Africa: Insights into the need for increased health literacy. | This study explored the levels of knowledge and screening rates of cervical cancer among vulnerable women living in the inner-city of Durban, South Africa. |
| Engelbrecht et al. | South Africa | 2022 | Factors Associated with Limited Vaccine Literacy: Lessons Learnt from COVID-19. | Therefore, this study aimed to assess levels of VL among the adult population in South Africa, as well as to identify factors associated with limited VL. |
| Etheredge et al. | South Africa | 2018 | Opt-in or opt-out to increase organ donation in South Africa? Appraising proposed strategies using an empirical ethics analysis. | we evaluate the merits of systems proposed to increase deceased organ donation in South Africa (SA) |
| Field et al. | South Africa | 2019 | Accessible continued professional development for maternal mental health | The aim of this study was to determine whether the Bettercare Maternal Mental Health book significantly improves knowledge and decreases stigma around mental health for care providers from the health and social development sectors. |
| Fincham et al. | South Africa | 2008 | Dietary and Fluid Adherence among Haemodialysis Patients Attending Public Sector Hospitals in the Western Cape | The purpose of this paper was to determine the applicability of the Theory of Planned Behaviour (TPB) in predicting dietary and fluid adherence among a sample of haemodialysis patients attending public sector hospitals in the Western Cape. |
| Galappaththi-Arachchige et al. | South Africa | 2018 | Reproductive health problems in rural South African young women: risk behaviour and risk factors. | This study seeks to examine the underlying factors that may be associated with these four adverse reproductive health outcomes. |
| Gordon et al. | South Africa | 2020 | Socio-economic inequalities in the multiple dimensions of access to healthcare: the case of South Africa. | This paper provides a diagnosis of the extent of socio-economic inequalities in health and healthcare using an integrated conceptual framework. |
| Haricharan et al. | South Africa | 2017 | Health promotion via SMS improves hypertension knowledge for deaf South Africans. | Additionally, the study aimed to assess the acceptability of using SMSs for health promotion targeting Deaf people. |
| Hathorn et al. | South Africa | 2021 | Help-Seeking Intention in Obsessive-Compulsive Disorder: Predictors and Barriers in South Africa. | Using the health belief model as a conceptual framework, study aims were to identify predictors of and barriers to help-seeking among South Africans with OCD |
| Hunter-Adams et al. | South Africa | 2017 | A Qualitative study of language barriers between South African health care providers and cross-border migrants. | In this article, we explore the complexity of health communication from the perspective of cross-border migrants seeking antenatal care in Cape Town, South Africa in order to highlight the importance of high quality medical interpretation. |
| Hussain-Alkhateeb et al. | South Africa | 2015 | Local perceptions of causes of death in rural South Africa: a comparison of perceived and verbal autopsy causes of death. | This study describes the agreement between VA-derived causes of death and informant-perceived causes and associated influential factors, which also reflects lay health literacy in this setting. |
| Joubert and Githinji | South Africa | 2014 | Quality and readability of information pamphlets on hearing and paediatric hearing loss in the Gauteng Province, South Africa. | The objectives of this study were therefore to determine the availability of information pamphlets on hearing and hearing loss in children at public hospitals in the Gauteng Province of South Africa. In addition, the quality and readability levels of these pamphlets were determined. |
| Kagee | South Africa | 2008 | Adherence to antiretroviral therapy in the context of the national roll-out in South Africa: Defining a research agenda for psychology. | I set a tentative agenda for psychosocial research with a view to enhancing the likelihood of optimal adherence among AIDS patients. |
| Keikelame and Swartz | South Africa | 2013 | Lost opportunities to improve health literacy: observations in a chronic illness clinic providing care for patients with epilepsy in Cape Town South Africa. | We used observation to gain a picture of interactions between patients with epilepsy and health care providers in a chronic illness clinic serving the marginalized population groups in Cape Town. |
| Kemp et al. | South Africa | 2021 | Pushing the bench: A mixed methods study of barriers to and facilitators of identification and referral into depression care by professional nurses in KwaZulu-Natal, South Africa. | This study explored barriers to and facilitators of nurse identification and referral of patients with depressive symptoms as part of integrated mental health service delivery in KwaZulu-Natal, South Africa. |
| Kometsi et al. | South Africa | 2020 | Mental health literacy: Conceptions of mental illness among African residents of Sisonke District in KwaZulu-Natal, South Africa. | This study investigated conceptions and aetiological beliefs about mental illness among 787 randomly selected African residents of Sisonke District using a survey |
| Korhonen et al. | South Africa | 2019 | Content validation of Mental Health Literacy Scale (MHLS) for primary healthcare workers in South Africa and Zambia ─ a heterogeneous expert panel method. | This study's aim was to adapt the content validity of the Mental health literacy Scale (MHLS) developed by O'Connor & Casey (2015) with researchers and primary health-care workers in low- and middle-income contexts in South Africa (SA) and in Zambia |
| Kubheka et al. | South Africa | 2020 | Social media health promotion in South Africa: Opportunities and challenges. | The aim of the review was conduct an analysis on the opportunities and challenges of the use of social media for health promotion in South Africa. |
| Lopes and McKay | South Africa | 2020 | [Adult Learning and Education as a Tool to Contain Pandemics: The COVID-19 Experience](https://eric.ed.gov/?q=abstract%3a+%22health+literacy%22+AND+(Afric*+OR+Afriq*+OR+Algeria*+OR+Angola*+OR+Benin*+OR+Botswana*+OR+Burkin*+OR+%e2%80%9cBurkina+Faso%e2%80%9d+OR+Burundi*+OR+%e2%80%9cCape+Verde*%e2%80%9d+OR+%e2%80%9cCabo+Verde*%e2%80%9d+OR+Verde*+OR+Cameroon*+OR+Chad*+OR+%e2%80%9cCentral+African*%e2%80%9d+OR+%e2%80%9cCentral+African+Republic%e2%80%9d+OR+Comor*+OR+Congo*+OR+DRC+OR+%e2%80%9cDemocratic+Republic+Congo%e2%80%9d+OR+Djibouti*+OR+Egypt*+OR+Equato*+OR+Eritrea*+OR+Eswatini+OR+Swazi*+OR+Ethiopia*+OR+Gabon*+OR+Gambia*+OR+Ghana*+OR+Guinea*+OR+Guinea-Bissau+OR+Guinea-Bissau*+OR+Bissau-Guinean*+OR+%22Ivory+Coast%22+OR+Ivorian*+OR+%e2%80%9cC%c3%b4te+d%e2%80%99Ivoire%e2%80%9d+OR+Kenya*+OR+Lesotho+OR+Basotho*+OR+Liberia*+OR+Libya*+OR+Madagasca*+OR+Malagasy*+OR+Malawi*+OR+Mali+OR+Malian*+OR+Mauritania*+OR+Mauriti*+OR+Morocc*+OR+Mozambi*+OR+Namibia*+OR+Niger*+OR+Nigeria*+OR+Rwanda*+OR+%22S%c3%a3o+Tom%c3%a9%22+OR+%22Sao+Tom*%22OR+Senegal*+OR+Seychell*+OR+Sierra+Leon*+OR+Somali*+OR+%22South+Africa*%22OR+%22South+Sudan*%22+OR+Sudan*+OR+Tanzania*+OR+Togo*+OR+Tunisia*+OR+Uganda*+OR+Zambia*+OR+Zimbabwe*)+NOT+%22African+American*%22&id=EJ1268087) | This article explains why ALE, especially the promotion of health literacy as part of ALE (which is itself part of lifelong learning), is necessary to enable individuals to make informed health-related decisions. |
| Lothe et al. | South Africa | 2018 | Treating schistosomiasis among South African high school pupils in an endemic area, a qualitative study. | This study aims to explore attitudes towards anti- schistosomal treatment. |
| Madlala et al. | South Africa | 2022 | Community mental health literacy in Tshwane region 1: A quantitative study. | To assess the literacy of three mental disorders, namely major depressive disorder (MDD), schizophrenia and generalised anxiety disorder (GAD) and to compare the resultant assumed literacy level between urban and townships participants. |
| Mafutha et al. | South Africa | 2017 | Development of a Hypertension Health Literacy Assessment Tool for use in primary healthcare clinics in South Africa, Gauteng. | To develop a Hypertension Heath Literacy Assessment Tool to establish patients' comprehension of the health education they receive in primary healthcare (PHC) clinics in Tshwane, Gauteng, South Africa. |
| Mall et al. | South Africa | 2013 | Mental health in primary human immunodeficiency virus care in South Africa: a study of provider knowledge, attitudes, and practice. | Two vignettes portraying HIV patients with depression and substance use (specifically problematic alcohol use) were presented to respondents to investigate their mental health literacy and attitudes toward mental disorders. |
| Manhanzva et al. | South Africa | 2017 | Gender and leadership for health literacy to combat the epidemic rise of noncommunicable diseases. | This case study highlights the burden of disease |
| Masuku et al. | South Africa | 2018 | I felt pain. Deep pain…': Experiences of primary caregivers of stroke survivors with aphasia in a South African township. | The aim of the study was to describe the caregiving experience of female caregivers of PWA residing in Tembisa, a township situated in the east of Johannesburg. |
| Matima et al. | South Africa | 2018 | A qualitative study on the experiences and perspectives of public sector patients in Cape Town in managing the workload of demands of HIV and type 2 diabetes multimorbidity. | how patients with chronic multimorbidities currently experience the (re)-organisation of health services and what their perceived needs are |
| Medina-Marino et al. | South Africa | 2020 | The role of trust and health literacy in nurse-delivered point-of-care STI testing for pregnant women living with HIV, Tshwane District, South Africa. | we explored the role patient-provider communications may play in supporting treatment adherence and STI disclosure to sexual partners. |
| Mhlongo et al. | South Africa | 2018 | Health education on diabetes at a South African national science festival | To determine the effects of a health education programme on increasing knowledge about diabetes and encouraging preventive measures. |
| Minty et al. | South Africa | 2021 | [Mental illness attitudes and knowledge in non-specialist medical doctors working in state and private sectors.](https://pubmed.ncbi.nlm.nih.gov/34192080/) | To investigate aspects of knowledge and attitudes towards mental illness of a group of private and state-employed non-specialist medical doctors. |
| Mohamed-Kaloo and Lather | South Africa | 2014 | Perceptions of mental illness among Muslim general practitioners in South Africa. | To investigate perceptions of mental illness in a sample of ten South African Muslim GPs (five male, five female) in the Lenasia area (Johannesburg, South Africa). |
| Mokwena and Ndlovu | South Africa | 2021 | Why Do Patients with Mental Disorders Default Treatment? A Qualitative Enquiry in Rural Kwazulu-Natal, South Africa. | The objective of this study was to determine the reasons for treatment defaulting at Manguzi Hospital, KwaZulu-Natal Province, South Africa. |
| Molete et al. | South Africa | 2013 | Oral health promotion in Gauteng: a qualitative study. | This study aimed to assess how health promoters in Gauteng integrate oral health into their general health promotion activities. |
| Monnapula-Mazabane and Petersen | South Africa | 2021 | Mental health stigma experiences among caregivers and service users in South Africa: a qualitative investigation. | The study aimed to understand the nature and context of mental health stigma among people living with a mental health condition and the subsequent effect on their caregivers. |
| Moodley et al. | South Africa | 2020 | They are inconveniencing us' - exploring how gaps in patient education and patient centred approaches interfere with TB treatment adherence: perspectives from patients and clinicians in the Free State Province, South Africa. | We explored clinician and patient perspectives of the gaps in TB messaging that influence TB treatment LTFU. |
| Moroe | South Africa | 2020 | Occupational noise induced hearing loss in the mining sector in South Africa: Perspectives from occupational health practitioners on how mineworkers are trained. | The aim of this study was to explore the perspectives of occupational health practitioners (OHPs) regarding education and training of mineworkers on occupational noise induced hearing loss (ONIHL) and its impact on mineworkers' health |
| Müller et al. | South Africa | 2019 | Effects of a School-Based Health Intervention Program in Marginalized Communities of Port Elizabeth, South Africa (the KaziBantu Study): Protocol for a Randomized Controlled Trial. | The aim of the KaziBantu project is to assess the effect of a school-based health intervention package on risk factors for NCDs, health behaviors, and psychosocial health in primary school children in disadvantaged communities in Port Elizabeth, South Africa. In addition, we aim to test a workplace health intervention for teachers. |
| Murphy et al. | South Africa | 2015 | A qualitative study of the experiences of care and motivation for effective self-management among diabetic and hypertensive patients attending public sector primary health care services in South Africa. | The aim of this study was to explore patients' current experiences of chronic care, as well as their motivation and capacity for self-management and lifestyle change. |
| Musakwa et al. | South Africa | 2021 | Perceived barriers to the uptake of health services among first-year university students in Johannesburg, South Africa. | The study aimed to identify perceived barriers to the uptake of health services among young adults entering the tertiary education system in South Africa. |
| Naidoo and Taylor | South Africa | 2015 | HIV health literacy, sexual behaviour and self-reports of having tested for HIV among students. | The HIV prevalence among young South African adults makes it important to understand their HIV knowledge, sexual behaviour and HIV counselling and testing (HCT) behaviour in this group. This paper presents the demographics, knowledge, sexual behaviour and cues to action as reported by sexually active students' who had HCT. |
| Noncungu and Chipps | South Africa | 2020 | Information-seeking in first visit pregnant women in Khayelitsha, South Africa. | This study describes the health education needs, information barriers and health information-seeking behaviour of pregnant women on their first visit to antenatal clinics in a low-income setting in the Western Cape. |
| Norris et al. | South Africa | 2022 | Building knowledge, optimising physical and mental health and setting up healthier life trajectories in South African women (*Bukhali*): a preconception randomised control trial part of the Healthy Life Trajectories Initiative (HeLTI). | Bukhali is the first individual randomised controlled trial in Africa to test the efficacy of a complex continuum of care intervention and forms part of the Healthy Life Trajectories Initiative (HeLTI) consortium implementing harmonised trials in Canada, China, India and SA |
| Patel and Dowse | South Africa | 2015 | Understanding the medicines information-seeking behaviour and information needs of South African long-term patients with limited literacy skills. | To investigate medicine information-seeking behaviour and information needs in patients with limited literacy. |
| Petersen and Lund | South Africa | 2011 | Mental health service delivery in South Africa from 2000 to 2010: one step forward, one step back. | To identify progress and challenges in mental healthcare in South Africa, as well as future mental health services research priorities. |
| Rensburg | South Africa | 2020 | Levels of health literacy and English comprehension in patients presenting to South African primary healthcare facilities. | The aim of this was to investigate, describe and compare health literacy and English comprehension levels of PHC patients using three locally adapted REALM-R (SA) tools and the LAB. |
| Sande et al. | South Africa | 2007 | The relationship between patient education and glycaemic control in a South African township. | To investigate if there is a relationship between patients' perceived diabetes education and their glycaemic control. |
| Selohilwe et al. | South Africa | 2019 | Evaluating the role of levels of exposure to a task shared depression counselling intervention led by behavioural health counsellors: outcome and process evaluation. | This study evaluated the relationship between levels of exposure to a task-shared counselling intervention and psychosocial outcomes (depression, functional disability, internalised stigma and social support) in chronic care service users with comorbid depression in South Africa guided by the Medical Research Council process evaluation framework. Implementation and participant-level factors that promote greater exposure were also investigated. |
| Smythe et al. | South Africa | 2022 | Access to health care for people with stroke in South Africa: a qualitative study of community perspectives. | We aimed to explore the perspectives and experiences of (people with stroke) PWS related to stroke care services to inform health system strengthening measures. |
| Sorsdahl et al. | South Africa | 2010 | Perspectives towards mental illness in people living with HIV/AIDS in South Africa. | We aimed to investigate the attitudes of PLWHA in South Africa towards people with psychiatric disorders, as well as mental health literacy in relation to four major disorders (depression, schizophrenia, PTSD and substance abuse). |
| Sorsdahl et al. | South Africa | 2012 | Negative attributions towards people with substance use disorders in South Africa: variation across substances and by gender. | Therefore, the present study examined the attributions made by the general South African population about people who use substances and whether these attributions differ by the type of substance being used, the gender of the person using the substance, or the characteristics of the person making the attribution. |
| Sorsdahl et al. | South Africa | 2012 | Mental Health Services in South Africa: Scaling up and future directions | We review key evidence regarding the burden and risk factors for mental disorders in South Africa and crucial challenges for local mental health services and research. |
| Spedding et al. | South Africa | 2018 | Pregnant wo~~m~~en's mental health literacy and perceptions of perinatal mental disorders in the Western Cape, South Africa. | However, little is known about how pregnant women perceive mental disorders during this time, particularly in low- and middle-income countries such as South Africa. |
| Strecker et al. | South Africa | 2014 | Health rights pamphlets: critical literacy and inclusive citizenship, South Africa. | The research reported here analyses how the pamphlets, coupled with directed training, strengthened skills, promoted critical literacy and supported inclusive citizenship |
| Surka et al. | South Africa | 2015 | Knowledge and perceptions of risk for cardiovascular disease: Findings of a qualitative investigation from a low-income peri-urban community in the Western Cape, South Africa. | We investigated the knowledge and perceptions about risk for cardiovascular disease in a community. |
| Thutloa and Stroud | South Africa | 2013 | Does active participation in health enhance health outcomes and health care delivery systems | This research report focuses on work produced as part of the first author's doctoral project, exploring the phenomenon of consumption of health resources for health citizenship in the private health insurance industry. |
| Treffry-Goatley et al. | South Africa | 2018 | Community engagement with HIV drug adherence in rural South Africa: a transdisciplinary approach. | Our aim was to use narratives of people living with HIV on antiretroviral therapy (ART) to stimulate dialogue among the wider community and to encourage reflection on the contextual factors that influence ART adherence in this setting. We also wanted to explore whether exposure to the personal narratives might influence health literacy around HIV and ART. |
| Wasserman et al. | South Africa | 2010 | Assessment of the English literacy level of patients in primary health. Care Services in Tshwane; Gauteng Province: Part 2 | The aim of this study was to assess the English literacy levels of primary health care patients using the Learning Ability Battery (LAB) and the adapted Rapid Estimate of Adult Literacy, Revised (REALM-R) and to determine how the results of the adapted REALM-R correlate with those of the LAB. |
| Wasserman et al. | South Africa | 2010 | Adaptation of the Rapid Estimate of Adult Literacy in Medicine Revised (REALM-R) to the South African context: Part 1 | The purpose of this paper was to adapt and validate the Rapid Estimate of Adult Literacy in Medicine Revised (REALM-R) to the South African context. |
| Worley et al. | South Africa | 2009 | Wellness programmes for persons living with HIV/AIDS: experiences from Eastern Cape province, South Africa. | This paper reviews components of wellness services for people living with HIV/AIDS including: voluntary counselling and testing, disclosure and prevention, ongoing counselling, health literacy and peer education, community- and home-based care, adherence support, and associated comprehensive care continuums. |
| Wouters et al. | South Africa | 2009 | Public-sector ART in the Free State Province, South Africa: community support as an important determinant of outcome. | This study aimed to extend the current literature by investigating how immunological and virological responses to ART, measured at three points in time (after six, 12, and 24 months of ART), are influenced by patient characteristics (age, sex), health literacy (educational level and knowledge about HIV/AIDS), baseline CD4 cell count, baseline viral load, and three forms of community support |
| Zanoni et al. | South Africa | 2021 | Development and validation of the HIV adolescent readiness for transition scale (HARTS) in South Africa. | In this study, we developed and validated a tool to identify adolescent transition readiness. |
| Atilola | Sub-Saharan Africa | 2016 | Mental health service utilization in sub-Saharan Africa: is public mental health literacy the problem? Setting the perspectives right. | not explicitly specified |
| Atilola | Sub-Saharan Africa | 2015 | Level of community mental health literacy in sub-Saharan Africa: current studies are limited in number, scope, spread, and cognizance of cultural nuances. | To conduct a systematic review of the findings of studies that have examined aspects of mental health literacy among community dwellers in sub-Saharan Africa. |
| Beia et al. | Sub-Saharan Africa | 2021 | Changing men or changing health systems? A scoping review of interventions, services and programmes targeting men's health in sub-Saharan Africa. | Within these studies, we identify dominant conceptualisations of men and men's health and how these have influenced the design of men's health interventions and services. |
| Dzifa et al. | Sub-Saharan Africa | 2018 | Predictors and outcome of systemic lupus erythematosus (SLE) admission rates in a large teaching hospital in sub-Saharan Africa. | This retrospective study examines characteristics and outcomes of hospitalized systemic lupus erythematosus patients over a two-year period and serves as a baseline for comparison for future studies to examine the outcomes with the provision of more dedicated care. |
| Mutebi et al. | Sub-Saharan Africa | 2020 | Engaging Patients for Clinical Trials in Africa: Patient-Centered Approaches. | not explicitly specified |
| Okumu et al. | Sub-Saharan Africa | 2021 | Alleviating psychological distress and promoting mental wellbeing among adolescents living with HIV in sub-Saharan Africa, during and after COVID-19. | our commentary highlights mental health challenges faced by ALHIV and their caregivers in SSA. |
| Sarfo and Ovbiagele | Sub-Saharan Africa | 2017 | Stroke minimization through additive anti-atherosclerotic agents in routine treatment (SMAART): A pilot trial concept for improving stroke outcomes in sub-Saharan Africa. | In this conceptual article, we review the data supporting the rationale for a polypill to improve stroke outcomes in SSA and propose the conduct of a Stroke Minimization through Additive Anti-atherosclerotic Agent in Routine Treatment (SMAART) pilot study to determine the impact of a polypill such as the Polycap DS® in reducing future vascular risk compared to usual care in recent stroke in SSA. |
| Thompson et al. | Sub-Saharan Africa | 2015 | The health literacy needs of women living with HIV/AIDS | The purpose of the study was to explore and describe the health literacy needs of women living with HIV |
| Wiginton et al. | Sub-Saharan Africa | 2022 | Hearing From Men Living With HIV: Experiences With HIV Testing, Treatment, and Viral Load Suppression in Four High-Prevalence Countries in Sub-Saharan Africa. | There is a critical need to better understand facilitators of men's successful engagement with HIV services and assess if there are similarities across contexts. |
| Mohale et al. | Sub-Saharan Africa, Australia | 2017 | Maternity health care: The experiences of Sub-Saharan African women in Sub-Saharan Africa and Australia. | The study aimed to examine the maternity experiences of Sub-Saharan African women who had given birth in both Sub-Saharan Africa and in Australia. |
| Bastien | Tanzania | 2009 | Access, agency and ambiguity: communication about AIDS among young people in Northern Tanzania. | The aim of this paper is to build on study findings suggesting that significant differences exist between young people in- and out-of-school in exposure to AIDS-related information and communication in Kilimanjaro |
| Dalsmo et al. | Tanzania | 2021 | "Now I Feel That I Can Achieve Something": Young Tanzanian Women's Experiences of Empowerment by Participating in Health Promotion Campaigns. | The aim of this qualitative study was to explore how some of these young Tanzanian women experience participating in health promotion campaigns |
| Higgins | Tanzania | 2014 | [Constructing Identities through Literacy Events in HIV/AIDS Education](https://eric.ed.gov/?q=abstract%3a+%22health+literacy%22+AND+(Afric*+OR+Afriq*+OR+Algeria*+OR+Angola*+OR+Benin*+OR+Botswana*+OR+Burkin*+OR+%e2%80%9cBurkina+Faso%e2%80%9d+OR+Burundi*+OR+%e2%80%9cCape+Verde*%e2%80%9d+OR+%e2%80%9cCabo+Verde*%e2%80%9d+OR+Verde*+OR+Cameroon*+OR+Chad*+OR+%e2%80%9cCentral+African*%e2%80%9d+OR+%e2%80%9cCentral+African+Republic%e2%80%9d+OR+Comor*+OR+Congo*+OR+DRC+OR+%e2%80%9cDemocratic+Republic+Congo%e2%80%9d+OR+Djibouti*+OR+Egypt*+OR+Equato*+OR+Eritrea*+OR+Eswatini+OR+Swazi*+OR+Ethiopia*+OR+Gabon*+OR+Gambia*+OR+Ghana*+OR+Guinea*+OR+Guinea-Bissau+OR+Guinea-Bissau*+OR+Bissau-Guinean*+OR+%22Ivory+Coast%22+OR+Ivorian*+OR+%e2%80%9cC%c3%b4te+d%e2%80%99Ivoire%e2%80%9d+OR+Kenya*+OR+Lesotho+OR+Basotho*+OR+Liberia*+OR+Libya*+OR+Madagasca*+OR+Malagasy*+OR+Malawi*+OR+Mali+OR+Malian*+OR+Mauritania*+OR+Mauriti*+OR+Morocc*+OR+Mozambi*+OR+Namibia*+OR+Niger*+OR+Nigeria*+OR+Rwanda*+OR+%22S%c3%a3o+Tom%c3%a9%22+OR+%22Sao+Tom*%22OR+Senegal*+OR+Seychell*+OR+Sierra+Leon*+OR+Somali*+OR+%22South+Africa*%22OR+%22South+Sudan*%22+OR+Sudan*+OR+Tanzania*+OR+Togo*+OR+Tunisia*+OR+Uganda*+OR+Zambia*+OR+Zimbabwe*)+NOT+%22African+American*%22&pg=2&id=EJ1038506) | This article examines the literacy events in HIV/AIDS education in Tanzania to investigate how they construct social identities for participants and to what extent they provide opportunities for critical health literacies |
| Higgins | Tanzania | 2010 | [Discursive Enactments of the World Health Organization's Policies: Competing Cultural Models in Tanzanian HIV/AIDS Prevention](https://eric.ed.gov/?q=abstract%3a+%22health+literacy%22+AND+(Afric*+OR+Afriq*+OR+Algeria*+OR+Angola*+OR+Benin*+OR+Botswana*+OR+Burkin*+OR+%e2%80%9cBurkina+Faso%e2%80%9d+OR+Burundi*+OR+%e2%80%9cCape+Verde*%e2%80%9d+OR+%e2%80%9cCabo+Verde*%e2%80%9d+OR+Verde*+OR+Cameroon*+OR+Chad*+OR+%e2%80%9cCentral+African*%e2%80%9d+OR+%e2%80%9cCentral+African+Republic%e2%80%9d+OR+Comor*+OR+Congo*+OR+DRC+OR+%e2%80%9cDemocratic+Republic+Congo%e2%80%9d+OR+Djibouti*+OR+Egypt*+OR+Equato*+OR+Eritrea*+OR+Eswatini+OR+Swazi*+OR+Ethiopia*+OR+Gabon*+OR+Gambia*+OR+Ghana*+OR+Guinea*+OR+Guinea-Bissau+OR+Guinea-Bissau*+OR+Bissau-Guinean*+OR+%22Ivory+Coast%22+OR+Ivorian*+OR+%e2%80%9cC%c3%b4te+d%e2%80%99Ivoire%e2%80%9d+OR+Kenya*+OR+Lesotho+OR+Basotho*+OR+Liberia*+OR+Libya*+OR+Madagasca*+OR+Malagasy*+OR+Malawi*+OR+Mali+OR+Malian*+OR+Mauritania*+OR+Mauriti*+OR+Morocc*+OR+Mozambi*+OR+Namibia*+OR+Niger*+OR+Nigeria*+OR+Rwanda*+OR+%22S%c3%a3o+Tom%c3%a9%22+OR+%22Sao+Tom*%22OR+Senegal*+OR+Seychell*+OR+Sierra+Leon*+OR+Somali*+OR+%22South+Africa*%22OR+%22South+Sudan*%22+OR+Sudan*+OR+Tanzania*+OR+Togo*+OR+Tunisia*+OR+Uganda*+OR+Zambia*+OR+Zimbabwe*)+NOT+%22African+American*%22&pg=3&id=EJ867248) | This article seeks to expand this body of research by exploring how health policies and health literacies are languaged in HIV/AIDS educational sessions in Tanzania. |
| Hovland et al. | Tanzania | 2021 | Experiences from cross-cultural collaboration in health campaigns in Tanzania: a qualitative study. | The aim of this study was to explore the participants' experiences with the cross-cultural collaboration in the planning and delivery of TICC's health campaigns. |
| Kutcher et al. | Tanzania | 2017 | [The African Guide: One Year Impact and Outcomes from the Implementation of a School Mental Health Literacy Curriculum Resource in Tanzania](https://eric.ed.gov/?q=abstract%3a+%22health+literacy%22+AND+(Afric*+OR+Afriq*+OR+Algeria*+OR+Angola*+OR+Benin*+OR+Botswana*+OR+Burkin*+OR+%e2%80%9cBurkina+Faso%e2%80%9d+OR+Burundi*+OR+%e2%80%9cCape+Verde*%e2%80%9d+OR+%e2%80%9cCabo+Verde*%e2%80%9d+OR+Verde*+OR+Cameroon*+OR+Chad*+OR+%e2%80%9cCentral+African*%e2%80%9d+OR+%e2%80%9cCentral+African+Republic%e2%80%9d+OR+Comor*+OR+Congo*+OR+DRC+OR+%e2%80%9cDemocratic+Republic+Congo%e2%80%9d+OR+Djibouti*+OR+Egypt*+OR+Equato*+OR+Eritrea*+OR+Eswatini+OR+Swazi*+OR+Ethiopia*+OR+Gabon*+OR+Gambia*+OR+Ghana*+OR+Guinea*+OR+Guinea-Bissau+OR+Guinea-Bissau*+OR+Bissau-Guinean*+OR+%22Ivory+Coast%22+OR+Ivorian*+OR+%e2%80%9cC%c3%b4te+d%e2%80%99Ivoire%e2%80%9d+OR+Kenya*+OR+Lesotho+OR+Basotho*+OR+Liberia*+OR+Libya*+OR+Madagasca*+OR+Malagasy*+OR+Malawi*+OR+Mali+OR+Malian*+OR+Mauritania*+OR+Mauriti*+OR+Morocc*+OR+Mozambi*+OR+Namibia*+OR+Niger*+OR+Nigeria*+OR+Rwanda*+OR+%22S%c3%a3o+Tom%c3%a9%22+OR+%22Sao+Tom*%22OR+Senegal*+OR+Seychell*+OR+Sierra+Leon*+OR+Somali*+OR+%22South+Africa*%22OR+%22South+Sudan*%22+OR+Sudan*+OR+Tanzania*+OR+Togo*+OR+Tunisia*+OR+Uganda*+OR+Zambia*+OR+Zimbabwe*)+NOT+%22African+American*%22&id=EJ1133871) | Following training, survey data addressing teacher reported AG impact and MHL outcomes was collected at three time points over a one year period. |
| Kutcher et al. | Tanzania | 2016 | A school mental health literacy curriculum resource training approach: effects on Tanzanian teachers' mental health knowledge, stigma and help-seeking efficacy. | not specified: Successful application of a school MHL curriculum resource may be an effective way to increase teacher MHL and therefore help to improve mental health outcomes for students. |
| Pallangyo et al. | Tanzania | 2020 | Knowledge of cardiovascular risk factors among caretakers of outpatients attending a tertiary cardiovascular center in Tanzania: a cross-sectional survey. | In view of the projected low health literacy in Tanzania, we conducted this cross-sectional survey to assess for CVD risk knowledge and its associated factors among patient escorts. |
| Perri-Moore et al. | Tanzania | 2015 | Using an eIMCI-Derived Decision Support Protocol to Improve Provider-Caretaker Communication for Treatment of Children Under 5 in Tanzania. | This study examines whether the use of mobile technology can leverage a standardized treatment protocol to improve the impact of counseling for children’s caretakers and result in better understanding of what needs to be done at home after the clinical visit. |
| Stone et al. | Tanzania | 2011 | ["I didn't know that ..." patient perceptions of print information, education, and communication related to HIV/AIDS treatment.](https://pubmed.ncbi.nlm.nih.gov/25566605/) | In this paper we present the results of those focus group discussions and introduce the print IEC materials as a pilot intervention in a Kiswahili-speaking setting where a need for additional health literacy exists |
| York et al. | Tanzania | 2015 | Factors affecting community participation in the CDTI program in Morogoro, Tanzania. | To explore community-perceived factors related to participation in and sustainability of the CDTI program in southwest Tanzania. |
| Jaiteh et al | The Gambia | 2019 | Community perspectives on treating asymptomatic infections for malaria elimination in The Gambia. | This mixed methods study explored people's attitudes towards the reactive treatment of compound contacts of malaria cases with a 3-day course of dihydroartemisinin-piperaquine (DHAP), the socio-cultural representations of asymptomatic infections, and more specifically their treatment. |
| Touray et al. | The Gambia | 2018 | Incidence and Outcomes after Out-of-Hospital Medical Emergencies in Gambia: A Case for the Integration of Prehospital Care and Emergency Medical Services in Primary Health Care. | Data on self-reported medical emergencies among adults in a selection of Gambian communities are presented in this report. |
| Akena et al. | Uganda | 2021 | The effectiveness of a psycho-education intervention on mental health literacy in communities affected by the COVID-19 pandemic-a cluster randomized trial of 24 villages in central Uganda-a research protocol. | For the proposed study, we will determine effectiveness of a psycho-education intervention delivered by village health team (VHT) members. |
| Bakeera et al. | Uganda | 2009 | Community perceptions and factors influencing utilization of health services in Uganda. | To explore community perceptions among three different wealth categories on factors influencing healthcare utilization in Eastern Uganda. |
| Cattamanchi et al. | Uganda | 2015 | Health worker perspectives on barriers to delivery of routine tuberculosis diagnostic evaluation services in Uganda: a qualitative study to guide clinic-based interventions. | Health worker perspectives on barriers to improving TB diagnostic evaluation are critical for developing clinic-level interventions to improve guideline implementation. |
| Chang et al. | Uganda | 2018 | Motivations of women in Uganda living with rheumatic heart disease: A mixed methods study of experiences in stigma, childbearing, anticoagulation, and contraception. | It is unclear whether this suboptimal contraception and anticoagulant use during pregnancy is due to lack of health system resources, limited health literacy, or social pressure to bear children. |
| Guttersrud et al. | Uganda | 2015 | Measuring Maternal Health Literacy in Adolescents Attending Antenatal Care in Uganda: Exploring the Dimensionality of the Health Literacy Concept Studying a Composite Scale. | The purpose of this article is to test the requirement of "local independence" in the newly developed "Maternal health literacy" (MaHeLi) composite scale measuring health literacy in pregnant adolescents attending antenatal care. |
| Jatho et al. | Uganda | 2021 | Capacity building for cancer prevention and early detection in the Ugandan primary healthcare facilities: Working toward reducing the unmet needs of cancer control services. | We aimed to contribute to reducing the unmet needs of cancer prevention and early detection services in Uganda through capacity building. |
| Jatho et al. | Uganda | 2020 | Socio-culturally mediated factors and lower level of education are the main influencers of functional cervical cancer literacy among women in Mayuge, Eastern Uganda. | We also assessed the factors associated with cervical cancer literacy and awareness about currently available cervical cancer preventive services. |
| Jones and Norton | Uganda | 2007 | [On the Limits of Sexual Health Literacy: Insights from Ugandan Schoolgirls](https://eric.ed.gov/?q=abstract%3a+%22health+literacy%22+AND+(Afric*+OR+Afriq*+OR+Algeria*+OR+Angola*+OR+Benin*+OR+Botswana*+OR+Burkin*+OR+%e2%80%9cBurkina+Faso%e2%80%9d+OR+Burundi*+OR+%e2%80%9cCape+Verde*%e2%80%9d+OR+%e2%80%9cCabo+Verde*%e2%80%9d+OR+Verde*+OR+Cameroon*+OR+Chad*+OR+%e2%80%9cCentral+African*%e2%80%9d+OR+%e2%80%9cCentral+African+Republic%e2%80%9d+OR+Comor*+OR+Congo*+OR+DRC+OR+%e2%80%9cDemocratic+Republic+Congo%e2%80%9d+OR+Djibouti*+OR+Egypt*+OR+Equato*+OR+Eritrea*+OR+Eswatini+OR+Swazi*+OR+Ethiopia*+OR+Gabon*+OR+Gambia*+OR+Ghana*+OR+Guinea*+OR+Guinea-Bissau+OR+Guinea-Bissau*+OR+Bissau-Guinean*+OR+%22Ivory+Coast%22+OR+Ivorian*+OR+%e2%80%9cC%c3%b4te+d%e2%80%99Ivoire%e2%80%9d+OR+Kenya*+OR+Lesotho+OR+Basotho*+OR+Liberia*+OR+Libya*+OR+Madagasca*+OR+Malagasy*+OR+Malawi*+OR+Mali+OR+Malian*+OR+Mauritania*+OR+Mauriti*+OR+Morocc*+OR+Mozambi*+OR+Namibia*+OR+Niger*+OR+Nigeria*+OR+Rwanda*+OR+%22S%c3%a3o+Tom%c3%a9%22+OR+%22Sao+Tom*%22OR+Senegal*+OR+Seychell*+OR+Sierra+Leon*+OR+Somali*+OR+%22South+Africa*%22OR+%22South+Sudan*%22+OR+Sudan*+OR+Tanzania*+OR+Togo*+OR+Tunisia*+OR+Uganda*+OR+Zambia*+OR+Zimbabwe*)+NOT+%22African+American*%22&pg=3&id=EJ814657) | the questions to be addressed in this article are as follows: to what extent are the young women in our study informed of the risks, responsibilities, outcomes, and impacts of sexual actions? To what extent are these young women free from sexual abuse and discrimination, and can they pursue abstinence where appropriate? To what extent do these young women have the freedom and opportunity to embrace their sexuality and make choices concerning reproduction? |
| Kaddumukasa et al. | Uganda | 2021 | Epilepsy beliefs and misconceptions among patient and community samples in Uganda. | The objective of the study was to characterize and compare the attitudes, beliefs, and perceptions about epilepsy across community and patient cohorts in Uganda. |
| Kendrick and Mutonyi | Uganda | 2007 | [Meeting the Challenge of Health Literacy in Rural Uganda: The Critical Role of Women and Local Modes of Communication](https://eric.ed.gov/?q=abstract%3a+%22health+literacy%22+AND+(Afric*+OR+Afriq*+OR+Algeria*+OR+Angola*+OR+Benin*+OR+Botswana*+OR+Burkin*+OR+%e2%80%9cBurkina+Faso%e2%80%9d+OR+Burundi*+OR+%e2%80%9cCape+Verde*%e2%80%9d+OR+%e2%80%9cCabo+Verde*%e2%80%9d+OR+Verde*+OR+Cameroon*+OR+Chad*+OR+%e2%80%9cCentral+African*%e2%80%9d+OR+%e2%80%9cCentral+African+Republic%e2%80%9d+OR+Comor*+OR+Congo*+OR+DRC+OR+%e2%80%9cDemocratic+Republic+Congo%e2%80%9d+OR+Djibouti*+OR+Egypt*+OR+Equato*+OR+Eritrea*+OR+Eswatini+OR+Swazi*+OR+Ethiopia*+OR+Gabon*+OR+Gambia*+OR+Ghana*+OR+Guinea*+OR+Guinea-Bissau+OR+Guinea-Bissau*+OR+Bissau-Guinean*+OR+%22Ivory+Coast%22+OR+Ivorian*+OR+%e2%80%9cC%c3%b4te+d%e2%80%99Ivoire%e2%80%9d+OR+Kenya*+OR+Lesotho+OR+Basotho*+OR+Liberia*+OR+Libya*+OR+Madagasca*+OR+Malagasy*+OR+Malawi*+OR+Mali+OR+Malian*+OR+Mauritania*+OR+Mauriti*+OR+Morocc*+OR+Mozambi*+OR+Namibia*+OR+Niger*+OR+Nigeria*+OR+Rwanda*+OR+%22S%c3%a3o+Tom%c3%a9%22+OR+%22Sao+Tom*%22OR+Senegal*+OR+Seychell*+OR+Sierra+Leon*+OR+Somali*+OR+%22South+Africa*%22OR+%22South+Sudan*%22+OR+Sudan*+OR+Tanzania*+OR+Togo*+OR+Tunisia*+OR+Uganda*+OR+Zambia*+OR+Zimbabwe*)+NOT+%22African+American*%22&pg=3&id=EJ814784) | This article seeks to better understand the relation between local and traditional modes of communication and health literacy within the context of a rural West Nile community in Northern Uganda. |
| Lynch et al. | Uganda | 2019 | Exploring patient experiences with and attitudes towards hypertension at a private hospital in Uganda: a qualitative study. | The ways in which patients' knowledge and attitudes toward hypertension determine their engagement with and adherence to available care, however, remains unclear |
| Miller et al. | Uganda | 2021 | Not Enough Money and Too Many Thoughts: Exploring Perceptions of Mental Health in Two Ugandan Districts Through the Mental Health Literacy Framework. | it is necessary to understand how mental health is conceptualized in the population. |
| Miller et al. | Uganda | 2020 | Representation of Mental Illness in Leading Ugandan Daily Newspapers: A Content Analysis. | This study investigated the coverage of mental illness in the two largest circulation newspapers in Uganda: |
| Naigaga et al. | Uganda | 2015 | Measuring maternal health literacy in adolescents attending antenatal care in a developing count~~r~~y - the impact of selected demographic characteristics. | The aim of this paper is to describe how selected demographic characteristics 'explain' the observed variance in the distribution of maternal health literacy estimates in adolescents attending antenatal care in Uganda, as estimated by the 'Maternal health literacy scale'. |
| Nalukenge et al. | Uganda | 2019 | Knowledge and causal attributions for mental disorders in HIV-positive children and adolescents: results from rural and urban Uganda. | We investigated knowledge and causal attributions for mental disorders in HIV-positive children and adolescents in rural and urban Uganda |
| Nsangi et al. | Uganda | 2020 | Effects of the Informed Health Choices primary school intervention on the ability of children in Uganda to assess the reliability of claims about treatment effects: a cluster-randomised controlled trial. | We aimed to evaluate an intervention designed to teach primary school children to assess claims about the effects of treatments (ie, any action intended to maintain or improve health). |
| Nwosu et al. | Uganda | 2020 | Influence of Caretakers' Health Literacy on Delays to Traumatic Brain Injury Care in Uganda. | This study seeks to determine the factors that impact TBI patient caretakers' health literacy and examine how these factors influence delays in care. |
| Okello et al. | Uganda | 2014 | Mental health literacy among secondary school students in North and Central Uganda: a qualitative study. | The objective of this study was to explore the mental health of young people in secondary schools in Northern and Central Uganda. |
| Patterson et al. | Uganda | 2020 | Acute gastrointestinal illness in an African Indigenous population: the lived experience of Uganda~~'~~s Batwa. | Using a mixed methods approach, this study characterized the lived experience of acute gastrointestinal illness (AGI) in an Indigenous Batwa population in south-western Uganda. |
| Semakula et al. | Uganda | 2020 | Effects of the Informed Health Choices podcast on the ability of parents of primary school children in Uganda to assess the trustworthiness of claims about treatment effects: one-year follow up of a randomised trial. | The overall aims of this follow-up study were to evaluate the impact of our intervention 1 year after it was administered, and to assess retention of learning and behaviour regarding claims about treatments. |
| Swahn et al. | Uganda | 2014 | Demographic and psychosocial characteristics of mobile phone ownership and usage among youth living in the slums of Kampala, Uganda. | The purpose of this study is to determine the prevalence of mobile phone ownership and use in this high-risk population and to identify psychosocial characteristics that may differentiate those owning and using a phone from those who do not. |
| Wandera and Kasumba | Uganda | 2017 | "Ebinyo"-The Practice of Infant Oral Mutilation in Uganda. | The paper explains reason for the persistence of the practice, and to further inform on IOM (infant oral mutilation) to health practitioners who were previously unaware of the practice. |
| Yantzi et al. | Uganda | 2019 | The disease isn't listening to the drug': The socio-cultural context of antibiotic use for viral respiratory infections in rural Uganda. | To identify factors precipitating antibiotic misuse and discuss how to promote safe antibiotics use and curb antibiotic resistance. |
| Davies et al. | Zambia | 2009 | Testing the health literacy of nurses in Zambia | This article describes an investigation of the literacy levels of three groups of Zambian nurses: Enrolled Nurses (two-year trained), Registered Nurses (three-year trained) and student Registered Nurses (post-initial training). |
| Mwambwa-Johnson | Zambia | 2021 | Mental health literacy among rural and urban young adults in Zambia. | The purpose of this quantitative cross-sectional study was to investigate the relationship between levels of MHL and attitudes and beliefs about mental illness and health-seeking behaviors of Zambian young adults aged 18 to 24. |
| Schrauben and Wiebe | Zambia | 2015 | Health literacy assessment in developing countries: a case study in Zambia. | We aimed to derive a measure of HL in data from the Demographic and Health Surveys (DHS) Program administered by the United States Agency for International Development (USAID), which includes items representing domains of HL as defined by the IOM |
| Sharpe et al. | Zambia | 2021 | Mental health and wellbeing implications of the COVID-19 quarantine for disabled and disadvantaged children and young people: evidence from a cross-cultural study in Zambia and Sierra Leone. | This study examined mental health of CYP during the first COVID-19 lockdown in Zambia and Sierra Leone. |
| Topp et al. | Zambia | 2018 | The health system accountability impact of prison health committees in Zambia. | We present findings from a nested evaluation of the impact of eight Prison Health Committees PrHCs 18 months after programme initiation. |
| Underwood et al. | Zambia | 2007 | Health communication in multilingual contexts: a study of reading preferences, practices, and proficiencies among literate adults in Zambia. | This article reports the results of a survey of 2,009 literate Zambian adults who were tested for reading comprehension of health materials written at fourth- and eighth-grade levels. |
| Smythe et al. | Zimbabwe | 2022 | A path toward disability-inclusive health in Zimbabwe Part 1: A qualitative study on access to healthcare. | Our objectives were to explore the experiences of people with disabilities in accessing care and identify opportunities for the health system to be designed for inclusion in Zimbabwe. |
| Terry et al. | Zimbabwe | 2005 | HIV/AIDS health literacy in Zimbabwe–focus group findings from university students. | This qualitative study was designed to assess program needs and evaluate and improve HIV/AIDS prevention efforts at the University of Zimbabwe. |
