# Supplementary material for: Health Literacy in Africa – A Scoping Review
Source: Preprints.org preprint supplement (doi:10.20944/preprints202409.0887.v1), 2024-09-12
Supplement: Supplementary file 2 [file supplementary]

## Appendix A: Health literacy in Africa

Search strategy:

("health literacy"[Title/Abstract] OR "littératie en santé"[Title/Abstract] OR "compétences en matière de santé"[Title/Abstract])

AND

(Afric\*[Title/Abstract] OR Afriq\*[Title/Abstract] OR Algeria\*[Title/Abstract] OR Angola\*[Title/Abstract] OR Benin\*[Title/Abstract] OR Botswana\*[Title/Abstract] OR Burkin\*[Title/Abstract] OR “Burkina Faso” [Title/Abstract] OR Burundi\*[Title/Abstract] OR “Cape Verde”[Title/Abstract] OR “Cabo Verde”[Title/Abstract] OR Verde\*[Title/Abstract] OR Cameroon\*[Title/Abstract] OR Chad\*[Title/Abstract] OR “Central African”[Title/Abstract] or “Central African Republic” [Title/Abstract] OR Comor\*[Title/Abstract] OR Congo\*[Title/Abstract] OR DRC[Title/Abstract] OR “Democratic Republic Congo”[Title/Abstract] OR Djibouti\*[Title/Abstract] OR Egypt\*[Title/Abstract] OR Equato\*[Title/Abstract] OR Eritrea\*[Title/Abstract] OR Eswatini[Title/Abstract] OR Swazi\*[Title/Abstract] OR Ethiopia\*[Title/Abstract] OR Gabon\*[Title/Abstract] OR Gambia\*[Title/Abstract] OR Ghana\*[Title/Abstract] OR Guinea\*[Title/Abstract] OR Guinea-Bissau[Title/Abstract] OR Guinea-Bissau\*[Title/Abstract] or Bissau-Guinean\*[Title/Abstract] OR "Ivory Coast"[Title/Abstract] OR Ivorian\*[Title/Abstract] OR Côte d’Ivoire[Title/Abstract] OR Kenya\*[Title/Abstract] OR Lesotho[Title/Abstract] OR Basotho\*[Title/Abstract] OR Liberia\*[Title/Abstract] OR Libya\*[Title/Abstract] OR Madagasca\*[Title/Abstract] OR Malagasy\*[Title/Abstract] OR Malawi\*[Title/Abstract] OR Mali[Title/Abstract] OR Malian\*[Title/Abstract] OR Mauritania\*[Title/Abstract] OR Mauriti\*[Title/Abstract] OR Morocc\*[Title/Abstract] OR Mozambi\*[Title/Abstract] OR Namibia\*[Title/Abstract] OR Niger\*[Title/Abstract] OR Nigeria\*[Title/Abstract] OR Rwanda\*[Title/Abstract] OR "São Tomé"[Title/Abstract] OR "Sao Tom”[Title/Abstract] OR Senegal\*[Title/Abstract] OR Seychell\*[Title/Abstract] OR Sierra Leon\*[Title/Abstract] OR Somali\*[Title/Abstract] OR "South Africa”[Title/Abstract] OR "South Sudan”[Title/Abstract] OR Sudan\*[Title/Abstract] OR Tanzania\*[Title/Abstract] OR Togo\*[Title/Abstract] OR Tunisia\*[Title/Abstract] OR Uganda\*[Title/Abstract] OR Zambia\*[Title/Abstract] OR Zimbabwe\*[Title/Abstract])

NOT

("African American”[Title/Abstract])
